# Supplementary material for: Trophic resource partitioning drives fine‐scale coexistence in cryptic bat species
Source: PubMed Central journal article supplement (PMC7771180; doi:10.1002/ece3.7004), 2020-11-11
Supplement: ECE3-10-14122-s002.pdf [file ECE3-10-14122-s002.pdf]

## Supporting Information for:

# Trophic resource partitioning drives fine-scale coexistence in cryptic bat species

Roberto Novella-Fernandez<sup>1</sup>, Carlos Ibañez<sup>2</sup>, Javier Juste<sup>2,3</sup>, Elizabeth L. Clare<sup>4</sup>, C. Patrick Doncaster<sup>1</sup>, Orly Razgour<sup>1,5</sup>

[1] School of Biological Sciences, University of Southampton, Southampton, UK

[2] Estación Biológica de Doñana (CSIC), Sevilla, Spain.

[3] CIBER Epidemiology and Public Health (CIBERESP), Spain

[4] School of Biological and Chemical Sciences, Queen Mary University of London, UK

[5] Biosciences, University of Exeter, Exeter, UK

## Table of Supplementary Tables

|                                                                                                                                                                                                                                                                                                                                                                                                                                              |    |
|----------------------------------------------------------------------------------------------------------------------------------------------------------------------------------------------------------------------------------------------------------------------------------------------------------------------------------------------------------------------------------------------------------------------------------------------|----|
| <b>Table S1</b> – Sampling locations and number of dropping samples processed in each location for each bat species (Mes: <i>Myotis escalerai</i> , Mcr: <i>Myotis crypticus</i> ). Sampling region and category of the location as regionally sympatric or allopatric or locally sympatric and allopatric. SweepS: Number of sweeping samples analysed.....                                                                                 | 3  |
| <b>Table S2</b> – Summary of criteria followed in the functional classification of the BINs recovered according to the likelihood of the bat capturing the arthropod by gleaning or aerial hawking. 0: Non-volant. 1: not actively volant. 2: Nocturnally volant. ....                                                                                                                                                                       | 4  |
| <b>Table S3</b> – Number of reads obtained for each sample from each primer (ANML and ZBJ) and replicate (1 and 2). Sample type: D= Dropping sample, S= Sweeping sample. BlankD and BlankSweep: extraction blanks for dropping (D) and sweeping (Sweep) samples. Blankseq: sequencing blank. Failed: If TRUE, sample has been removed under the conservative criteria, due to insufficient number of reads in at least one of the runs. .... | 6  |
| <b>Table S4</b> – BINs removed from specific samples based on their presence in Extraction blanks. They had either more than 100 reads or less than 10 times more read than in blanks. ....                                                                                                                                                                                                                                                  | 13 |
| <b>Table S5</b> – BINs removed from specific samples and run based on their presence in sequencing blanks. They had either more than 100 reads or less than 10 times more reads than in blanks.                                                                                                                                                                                                                                              | 14 |

## Table of Supplementary Figures

|                                                                                                                                                                                                                                                                                                                                                                                                                                                               |    |
|---------------------------------------------------------------------------------------------------------------------------------------------------------------------------------------------------------------------------------------------------------------------------------------------------------------------------------------------------------------------------------------------------------------------------------------------------------------|----|
| <b>Fig. S1</b> – Flow chart summarising the process followed to to obtain taxonomic prey composition from dropping samples of <i>M. escalerai</i> and <i>M. crypticus</i> . .....                                                                                                                                                                                                                                                                             | 22 |
| <b>Fig. S2</b> – Diet of <i>Myotis escalerai</i> (a) and <i>Myotis crypticus</i> (b) according to percent frequency of occurrence (POO), weighted percent of occurrence (wPOO) and relative read abundance (RRA). .....                                                                                                                                                                                                                                       | 23 |
| <b>Fig. S3</b> – Number of BINs/sample of each of the four main Arthropod orders in the diet of <i>Myotis escalerai</i> and <i>Myotis crypticus</i> . Box represents first and third data quartiles. Whiskers extend from the hinge to the largest value no further than 1.5 * distance between the first and third quartiles. Data beyond the end of the whiskers are plotted individually. Statistically significant differences are noted with a star..... | 24 |
| <b>Fig. S4</b> – Number of BINs of each of the four main Arthropod orders in bat samples from sympatric and allopatric locations at the regional scale (a) and at fine scale (b). Statistically significant differences are noted with a star. Boxplot interpretation is detailed in Fig. S3. ....                                                                                                                                                            | 25 |
| <b>Fig. S5</b> – Selection values (bat diet wPOO – Arthropod availability) of <i>M. escalerai</i> and <i>M. crypticus</i> towards each of the main arthropod orders. Boxplot interpretation is detailed in Fig. S3. ....                                                                                                                                                                                                                                      | 26 |
| <b>Fig. S6</b> – Number of BINS of each order. Portions coloured depending on the primer from which it was recovered. Red recovered uniquely by ANML, green uniquely by ZBJ, and blue recovered by both. Numbers above columns show number of BINs.....                                                                                                                                                                                                       | 27 |
| <b>Fig. S7</b> – Prey order composition of a subset of individual dropping samples (RNF 1-21) comparing ANML (left) and ZBJ (right) primers. Number on top of each pie chart shows total BINs recovered.....                                                                                                                                                                                                                                                  | 28 |
| <b>Fig. S8</b> – Prey order composition of a subset of individual dropping samples (RNF 22-42) comparing ANML (left) and ZBJ (right) primers. Number on top of each pie chart shows total BINs recovered.....                                                                                                                                                                                                                                                 | 29 |
| <b>Fig. S9</b> – Number of samples in which each order appears in the morphological identification of sweeping samples (total bar height), and portion of those in which the order was present and absent in the subsequent molecular metabarcoding identification. ....                                                                                                                                                                                      | 30 |

**Supplementary Data file S1** – BINs identified in the study, number of samples in which they appear for each bat species and functional classification according to their likelihood of being captured by gleaning or aerial hawking.

## Supplementary Tables

**Table S1** – Sampling locations and number of dropping samples processed in each location for each bat species (Mes: *Myotis escalerai*, Mcr: *Myotis crypticus*). Sampling region and category of the location as regionally sympatric or allopatric or locally sympatric and allopatric. SweepS: Number of sweeping samples analysed.

|    | Location name                  | Longitude | Latitude | Sampling Region       | Regional sympatry | Local sympatry | Mes | Mcr | SweepS |
|----|--------------------------------|-----------|----------|-----------------------|-------------------|----------------|-----|-----|--------|
| 1  | Alquife                        | -3.11     | 37.18    | Andalusia             | Allopatry         | NA             | 2   | 0   | NA     |
| 2  | Arroyo Tejuelo                 | -2.57     | 38.32    | Andalusia             | Allopatry         | NA             | 3   | 0   | NA     |
| 3  | Buenamar                       | -2.78     | 38.25    | Andalusia             | Allopatry         | NA             | 1   | 0   | NA     |
| 4  | Cueva Murcielaguina, Hormos    | -2.71     | 38.22    | Andalusia             | Allopatry         | NA             | 1   | 0   | NA     |
| 5  | El Chorro                      | -3.01     | 37.87    | Andalusia             | Allopatry         | NA             | 29  | 0   | NA     |
| 6  | El Tobazo, Villaescusa de Ebro | -3.83     | 42.82    | Cantabria             | Sympatry          | Allo           | 0   | 1   | NA     |
| 7  | Ermita de Somera               | -4.02     | 42.87    | Cantabria             | Sympatry          | Allo           | 0   | 1   | NA     |
| 8  | Fuente de la Garganta          | -2.89     | 37.9     | Andalusia             | Allopatry         | NA             | 3   | 0   | NA     |
| 9  | Arroyo Frío o de los Ubios     | -2.9      | 37.94    | Andalusia             | Allopatry         | NA             | 11  | 0   | 2      |
| 10 | Siles                          | -2.57     | 38.32    | Andalusia             | Allopatry         | NA             | 4   | 0   | 1      |
| 11 | Linarejos                      | -2.91     | 37.92    | Andalusia             | Allopatry         | NA             | 1   | 0   | NA     |
| 12 | Roblehondo                     | -2.88     | 37.95    | Andalusia             | Allopatry         | NA             | 5   | 0   | 1      |
| 13 | Arroyo de la Canal             | -2.96     | 37.79    | Andalusia             | Allopatry         | NA             | 6   | 0   | 2      |
| 14 | Mina del Gato                  | -3.09     | 37.16    | Andalusia             | Allopatry         | NA             | 13  | 0   | 3      |
| 15 | Cañada de los Arroyos          | -2.98     | 37.84    | Andalusia             | Allopatry         | NA             | 1   | 0   | NA     |
| 16 | Monte Hijedo                   | -3.93     | 42.89    | Cantabria             | Sympatry          | Allo           | 0   | 2   | 1      |
| 17 | Buyezo, Riega de Tornes        | -4.5      | 43.13    | Cantabria             | Allopatry         | NA             | 0   | 3   | 3      |
| 18 | Rubionzu                       | -3.81     | 43.25    | Cantabria             | Allopatry         | NA             | 0   | 1   | NA     |
| 19 | Liendo, Manás de la Iseca      | -3.36     | 43.37    | Cantabria             | Allopatry         | NA             | 0   | 2   | NA     |
| 20 | Pinar de las nieves            | -3.35     | 43.31    | Cantabria             | Allopatry         | NA             | 0   | 1   | NA     |
| 21 | Toberas                        | -3.37     | 43.32    | Cantabria             | Allopatry         | NA             | 0   | 2   | NA     |
| 22 | Pozos de Valcava               | -3.78     | 43.36    | Cantabria             | Allopatry         | NA             | 0   | 1   | NA     |
| 23 | Puente Mercadillo a            | -4.22     | 42.88    | Cantabria             | Sympatry          | Sym            | 0   | 7   | 2      |
| 24 | Puente Mercadillo p            | -4.22     | 42.88    | Cantabria             | Sympatry          | Sym            | 1   | 0   | NA     |
| 25 | Hayedo, Suano                  | -4.2      | 42.97    | Cantabria             | Allopatry         | NA             | 0   | 1   | NA     |
| 26 | San Martín de Valdelomar       | -4.15     | 42.8     | Cantabria             | Sympatry          | Sym            | 0   | 5   | 1      |
| 27 | Cuevatón                       | -4.17     | 42.81    | Cantabria             | Sympatry          | Sym            | 1   | 2   | 3      |
| 28 | Coroneles                      | -4.07     | 42.82    | Cantabria             | Sympatry          | Allo           | 0   | 8   | 1      |
| 29 | Ermita de la Velilla           | -3.93     | 42.8     | Cantabria             | Sympatry          | Sym            | 1   | 4   | 1      |
| 30 | Salcedo                        | -3.95     | 42.82    | Cantabria             | Sympatry          | Sym            | 1   | 2   | 1      |
| 31 | Río Torina                     | -4.04     | 43.11    | Cantabria             | Allopatry         | NA             | 0   | 1   | NA     |
| 32 | Liébana, San Pedro Bedoya      | -4.56     | 43.18    | Cantabria             | Allopatry         | NA             | 0   | 3   | 2      |
| 33 | Ginebret                       | 2.7       | 42.28    | Catalonia             | Sympatry          | NA             | 4   | 5   | 1      |
| 34 | El Rasillo                     | -2.72     | 42.2     | La Rioja              | Sympatry          | Allo           | 0   | 3   | 2      |
| 35 | Ermita de Lollano              | -2.66     | 42.15    | La Rioja              | Sympatry          | Allo           | 0   | 17  | 1      |
| 36 | Cueva del Moro, Valgañón       | -3.08     | 42.32    | La Rioja              | Sympatry          | Sym            | 2   | 1   | 1      |
| 37 | Calamantio                     | -2.93     | 42.19    | La Rioja              | Sympatry          | Allo           | 0   | 2   | NA     |
| 38 | Valvanera                      | -2.87     | 42.23    | La Rioja              | Sympatry          | Allo           | 0   | 1   | NA     |
| 39 | Cueva Cuatro puertas           | -2.25     | 42.2     | La Rioja              | Sympatry          | Allo           | 3   | 0   | 1      |
| 40 | Cueva Cerraúco                 | -2.74     | 42.18    | La Rioja              | Sympatry          | Allo           | 0   | 4   | 1      |
| 41 | Túnel Arnedillo                | -2.2      | 42.2     | La Rioja              | Sympatry          | Allo           | 8   | 0   | 2      |
| 42 | Dehesa de Villoslada           | -2.68     | 42.12    | La Rioja              | Sympatry          | Allo           | 0   | 6   | 1      |
| 43 | Cueva Azagra                   | -1.87     | 42.28    | Navarra               | Sympatry          | Allo           | 15  | 0   | NA     |
| 44 | Cueva del Agua, Villaciervos   | -2.66     | 41.78    | Castilla<br>la Mancha | Sympatry          | Allo           | 20  | 0   | 1      |
| 45 | Parador Nacional               | -2.96     | 37.9     | Andalusia             | Allopatry         | NA             | 1   | 0   | NA     |
| 46 | Peña Olivar                    | -2.58     | 38.37    | Andalusia             | Allopatry         | NA             | 1   | 0   | NA     |
| 47 | Quejigal, Villacantiz          | -4.19     | 43       | Cantabria             | Allopatry         | NA             | 0   | 2   | NA     |
| 48 | Regato Troncos, la Matilla     | -3.94     | 42.82    | Cantabria             | Sympatry          | Sym            | 0   | 1   | NA     |
| 49 | Vega de Villafufre             | -3.85     | 43.26    | Cantabria             | Allopatry         | NA             | 0   | 1   | NA     |

**Table S2** – Summary of criteria followed in the functional classification of the BINs recovered according to the likelihood of the bat capturing the arthropod by gleaning or aerial hawking. 0: Non-volant. 1: not actively volant. 2: Nocturnally volant.

| Order         | Number of BINs | Functional groups | Criteria used                          | References                                                                                                                                                                                                     |
|---------------|----------------|-------------------|----------------------------------------|----------------------------------------------------------------------------------------------------------------------------------------------------------------------------------------------------------------|
| Araneae       | 140            | 0                 | Morphological                          |                                                                                                                                                                                                                |
| Archaeognatha | 1              | 0                 | Morphological                          |                                                                                                                                                                                                                |
| Blattodea     | 7              | 0, 1              | Morphological                          |                                                                                                                                                                                                                |
| Coleoptera    | 87             | 1,2               | Literature                             | (Haack, Keena, & Eyre, 2017) (Cerambycidae)(Nalepa, 2013) (Coccinelidae)                                                                                                                                       |
| Dermaptera    | 2              | 0                 | Morphological                          |                                                                                                                                                                                                                |
| Diptera       | 423            | 1, 2              | Taxonomist (Jorge Mederos), Literature | (Oosterbroek, 2006)                                                                                                                                                                                            |
| Ephemeroptera | 6              | 2                 | Literature                             |                                                                                                                                                                                                                |
| Hemiptera     | 96             | 1                 | Literature                             | (Waloff & Bakker, 1963)                                                                                                                                                                                        |
| Hymenoptera   | 68             | 1, 2              | Literature                             | (Broad, 2005; Lozan, Belokobylskij, Achterberg, & Monaghan, 2010; Mazon, Bordera, & Rodríguez-Berrío, 2009; Quicke, 2014; Short, Schmidt, & Steinbauer, 2006)(Ichneumonoidea, (Tilgner, 2004) (Tenthredinidae) |
| Isopoda       | 2              | 0                 | Morphological                          |                                                                                                                                                                                                                |
| Lepidoptera   | 560            | 2                 | Literature                             |                                                                                                                                                                                                                |
| Mantodea      | 1              | 1                 | own observations                       |                                                                                                                                                                                                                |
| Mecoptera     | 1              | 2                 | Literature                             |                                                                                                                                                                                                                |
| Neuroptera    | 19             | 2                 | Literature                             | Vaset al 1999                                                                                                                                                                                                  |
| Odonata       | 5              | 1                 | Literature                             | (Corbet, 1999)                                                                                                                                                                                                 |
| Orthoptera    | 36             | 1                 | Literature                             |                                                                                                                                                                                                                |
| Plecoptera    | 1              | 2                 | Literature                             |                                                                                                                                                                                                                |
| Thysanoptera  | 2              | 0                 | Morphological                          |                                                                                                                                                                                                                |
| Trichoptera   | 6              | 2                 | Literature                             |                                                                                                                                                                                                                |

Broad, G. R. (2005). Keys for the identification of British and Irish nocturnal Ichneumonidae.

Corbet, P. S. (1999). *Dragonflies: Behaviour and Ecology of Odonata* (Revised ed). Harley Books.

Haack, R. A., Keena, M. A., & Eyre, D. (2017). Life history and population dynamics of cerambycids. *Cerambycidae of the World: Biology and Pest Management*, 71–103. doi:10.1201/b21851

Lozan, A. I., Belokobylskij, S., Achterberg, C. van Van, & Monaghan, M. T. (2010). Diversity and Distribution of Braconidae, a Family of Parasitoid Wasps in the Central European Peatbogs of South Bohemia, Czech Republic. *Journal of Insect Science*, 10(16), 1–21. doi:10.1673/031.010.1601

- Mazon, M., Bordera, S., & Rodríguez-Berrío, A. (2009). Diurnal flight activity of Ichneumonidae (Insecta: Hymenoptera) in Cabañeros National Park (Spain). *Journal of Natural History*, 43(21–22), 1291–1304. doi:10.1080/00222930902878966
- Nalepa, C. A. (2013). Coccinellidae captured in blacklight traps: Seasonal and diel pattern of the dominant species *Harmonia axyridis* (Coleoptera: Coccinellidae). *European Journal of Entomology*, 110(4), 593–597. doi:10.14411/eje.2013.080
- Oosterbroek, P. (2006). *The European Families of the Diptera*. The European Families of the Diptera. KNNV Publishing. doi:10.1163/9789004278066
- Quicke, D. L. J. (2014). *The Braconid and Ichneumonid Parasitoid Wasps*. Chichester, UK: John Wiley & Sons, Ltd. doi:10.1002/9781118907085
- Short, M., Schmidt, S., & Steinbauer, M. (2006). A key to some Australian genera of large nocturnal Ichneumonidae (Hymenoptera), including flight periodicities and influence of moon phase on light trap catches. *Australian Entomologist, The*, 33(1), 49–55.
- Tilgner, E. H. (2004). *Encyclopedia of Entomology*. (J. L. Capinera, Ed.), *Encyclopedia of Insects*. doi:10.1016/B978-0-12-374144-8.00203-4
- Waloff, N., & Bakker, K. (1963). The Flight Activity of Miridae (Heteroptera) Living on Broom, *Sarothamnus scoparius* (L.). *Journal of Animal Ecology*, 32(3), 461–480.

**Table S3** – Number of reads obtained for each sample from each primer (ANML and ZBJ) and replicate (1 and 2). Sample type: D= Dropping sample, S= Sweeping sample. BlankD and BlankSweep: extraction blanks for dropping (D) and sweeping (Sweep) samples. Blankseq: sequencing blank. Failed: If TRUE, sample has been removed under the conservative criteria, due to insufficient number of reads in at least one of the runs.

| Sample name | ANML_1 | ANML_2 | ZBJ_1 | ZBJ_2 | Sample type | Failed |
|-------------|--------|--------|-------|-------|-------------|--------|
| RNF_1       | 3      | 30     | 839   | 2077  | D           | TRUE   |
| RNF_2       | 4129   | 749    | 3271  | 7860  | D           | .      |
| RNF_3       | 6015   | 8336   | 4615  | 8843  | D           | .      |
| RNF_4       | 2779   | 2262   | 3967  | 3587  | D           | .      |
| RNF_5       | 542    | 252    | 576   | 1310  | D           | .      |
| RNF_6       | 5586   | 10536  | 5546  | 6788  | D           | .      |
| RNF_7       | 441    | 610    | 1658  | 2735  | D           | .      |
| RNF_8       | 3426   | 1385   | 3454  | 3254  | D           | .      |
| RNF_9       | 761    | 310    | 2533  | 2198  | D           | .      |
| RNF_10      | 2098   | 2015   | 3010  | 3960  | D           | .      |
| RNF_11      | 571    | 614    | 484   | 447   | D           | .      |
| RNF_12      | 265    | 159    | 546   | 376   | D           | .      |
| RNF_13      | 2528   | 1075   | 2539  | 604   | D           | .      |
| RNF_14      | 6233   | 7633   | 4613  | 4177  | D           | .      |
| RNF_15      | 149    | 77     | 30    | 37    | D           | TRUE   |
| RNF_16      | 7072   | 3610   | 2349  | 2680  | D           | .      |
| RNF_17      | 1993   | 1934   | 216   | 251   | D           | .      |
| RNF_18      | 2121   | 4254   | 526   | 419   | D           | .      |
| RNF_19      | 2086   | 3701   | 4638  | 4492  | D           | .      |
| RNF_20      | 6443   | 7418   | 3284  | 3187  | D           | .      |
| RNF_21      | 3352   | 7350   | 1961  | 3072  | D           | .      |
| RNF_22      | 2      | 772    | 39    | 81    | D           | TRUE   |
| RNF_23      | 3700   | 1544   | 1546  | 320   | D           | .      |
| RNF_24      | 1150   | 4350   | 2603  | 3363  | D           | .      |
| RNF_25      | 649    | 2122   | 29    | 512   | D           | TRUE   |
| RNF_26      | 669    | 247    | 2691  | 2537  | D           | .      |
| RNF_27      | 3303   | 4512   | 4815  | 6308  | D           | .      |
| RNF_28      | 6148   | 7204   | 1727  | 3799  | D           | .      |
| RNF_29      | 144    | 668    | 3089  | 7763  | D           | .      |
| RNF_30      | 45     | 25     | 147   | 1150  | D           | TRUE   |
| RNF_31      | 372    | 330    | 1591  | 1802  | D           | .      |
| RNF_32      | 338    | 136    | 1837  | 1287  | D           | .      |
| RNF_33      | 6      | 7      | 967   | 888   | D           | TRUE   |
| RNF_34      | 2929   | 3541   | 52    | 9     | D           | TRUE   |
| RNF_35      | 3039   | 9730   | 4951  | 5396  | D           | .      |
| RNF_36      | 6277   | 6511   | 4911  | 7008  | D           | .      |
| RNF_37      | 6088   | 14238  | 4779  | 6216  | D           | .      |
| RNF_38      | 5      | 9957   | 7127  | 6530  | D           | TRUE   |

|        |      |       |      |      |   |      |
|--------|------|-------|------|------|---|------|
| RNF_39 | 6167 | 8827  | 2018 | 2368 | D | .    |
| RNF_40 | 6519 | 6599  | 7520 | 6833 | D | .    |
| RNF_41 | 3444 | 6308  | 4627 | 5045 | D | .    |
| RNF_42 | 3738 | 6604  | 1598 | 1822 | D | .    |
| RNF_43 | 3436 | 13103 | 1163 | 181  | D | .    |
| RNF_44 | 4311 | 9291  | 541  | 5673 | D | .    |
| RNF_45 | 932  | 91    | 38   | 62   | D | TRUE |
| RNF_46 | 3227 | 7602  | 3995 | 4363 | D | .    |
| RNF_47 | 6441 | 9061  | 6231 | 7498 | D | .    |
| RNF_48 | 1    | 3307  | 5372 | 6126 | D | TRUE |
| RNF_49 | 2109 | 3973  | 4135 | 4434 | D | .    |
| RNF_50 | 3139 | 3421  | 7682 | 6700 | D | .    |
| RNF_52 | 46   | 1270  | 308  | 3337 | D | TRUE |
| RNF_53 | 205  | 37    | 1054 | 3325 | D | TRUE |
| RNF_54 | 1776 | 4670  | 1215 | 1306 | D | .    |
| RNF_55 | 110  | 75    | 66   | 72   | D | TRUE |
| RNF_56 | 1360 | 1226  | 1336 | 1032 | D | .    |
| RNF_57 | 2260 | 1974  | 393  | 745  | D | .    |
| RNF_58 | 4156 | 5322  | 1124 | 1120 | D | .    |
| RNF_59 | 3    | 6320  | 975  | 1320 | D | TRUE |
| RNF_60 | 5098 | 2525  | 366  | 578  | D | .    |
| RNF_61 | 1248 | 1579  | 1191 | 1391 | D | .    |
| RNF_62 | 5    | 2     | 1    | 8    | D | TRUE |
| RNF_63 | 0    | 9     | 576  | 3    | D | TRUE |
| RNF_64 | 2426 | 3131  | 5563 | 6426 | D | .    |
| RNF_65 | 1592 | 54    | 3583 | 5333 | D | TRUE |
| RNF_66 | 1    | 467   | 62   | 14   | D | TRUE |
| RNF_67 | 4008 | 3366  | 5413 | 5077 | D | .    |
| RNF_68 | 4480 | 8082  | 5730 | 6941 | D | .    |
| RNF_69 | 2330 | 3157  | 4818 | 5430 | D | .    |
| RNF_70 | 3477 | 6658  | 4769 | 4402 | D | .    |
| RNF_71 | 4111 | 7231  | 2528 | 922  | D | .    |
| RNF_72 | 1247 | 1629  | 2404 | 2133 | D | .    |
| RNF_73 | 7623 | 540   | 2515 | 3077 | D | .    |
| RNF_74 | 4321 | 5151  | 4381 | 6201 | D | .    |
| RNF_75 | 3140 | 5082  | 5570 | 6323 | D | .    |
| RNF_76 | 3150 | 4352  | 5146 | 6508 | D | .    |
| RNF_77 | 1256 | 1349  | 6153 | 5925 | D | .    |
| RNF_78 | 625  | 2246  | 2658 | 1740 | D | .    |
| RNF_79 | 3134 | 3759  | 2076 | 851  | D | .    |
| RNF_80 | 1911 | 3627  | 4292 | 3688 | D | .    |
| RNF_81 | 2447 | 3028  | 1306 | 1337 | D | .    |
| RNF_82 | 2820 | 2844  | 896  | 1001 | D | .    |
| RNF_83 | 3114 | 715   | 8495 | 7349 | D | .    |
| RNF_84 | 4330 | 3322  | 3637 | 6789 | D | .    |

|         |      |       |      |      |   |      |
|---------|------|-------|------|------|---|------|
| RNF_85  | 4789 | 5204  | 6422 | 7623 | D | .    |
| RNF_86  | 2954 | 9595  | 5067 | 6202 | D | .    |
| RNF_87  | 5940 | 11539 | 5340 | 6157 | D | .    |
| RNF_88  | 4735 | 10223 | 1815 | 3362 | D | .    |
| RNF_89  | 5501 | 9866  | 3752 | 4250 | D | .    |
| RNF_90  | 88   | 2448  | 81   | 297  | D | TRUE |
| RNF_91  | 4266 | 8944  | 3216 | 3091 | D | .    |
| RNF_92  | 6646 | 4014  | 5294 | 6902 | D | .    |
| RNF_93  | 4813 | 8490  | 4773 | 4622 | D | .    |
| RNF_94  | 5237 | 4735  | 4001 | 5707 | D | .    |
| RNF_95  | 6347 | 8863  | 5118 | 6249 | D | .    |
| RNF_96  | 7575 | 7644  | 3536 | 5274 | D | .    |
| RNF_97  | 4823 | 7053  | 2823 | 2572 | D | .    |
| RNF_98  | 6786 | 7938  | 4842 | 2629 | D | .    |
| RNF_99  | 2985 | 1398  | 4005 | 4316 | D | .    |
| RNF_100 | 0    | 364   | 6    | 1    | D | TRUE |
| RNF_101 | 7102 | 8656  | 6250 | 5290 | D | .    |
| RNF_102 | 111  | 21    | 1840 | 1607 | D | TRUE |
| RNF_103 | 3844 | 3541  | 5300 | 5460 | D | .    |
| RNF_104 | 3150 | 6490  | 447  | 386  | D | .    |
| RNF_105 | 9    | 4     | 157  | 55   | D | TRUE |
| RNF_106 | 1165 | 0     | 3323 | 3841 | D | TRUE |
| RNF_107 | 5289 | 7522  | 8277 | 6929 | D | .    |
| RNF_108 | 3217 | 1652  | 4594 | 2726 | D | .    |
| RNF_109 | 80   | 6234  | 60   | 2099 | D | TRUE |
| RNF_110 | 1716 | 2300  | 4433 | 5770 | D | .    |
| RNF_111 | 1886 | 2110  | 2617 | 3050 | D | .    |
| RNF_112 | 2537 | 2155  | 1457 | 1490 | D | .    |
| RNF_113 | 1508 | 939   | 3303 | 3006 | D | .    |
| RNF_114 | 6116 | 7359  | 5986 | 6927 | D | .    |
| RNF_115 | 5192 | 6602  | 4217 | 4112 | D | .    |
| RNF_116 | 694  | 597   | 2225 | 1768 | D | .    |
| RNF_117 | 4657 | 4713  | 4673 | 5374 | D | .    |
| RNF_118 | 5395 | 5967  | 2967 | 2711 | D | .    |
| RNF_119 | 3979 | 4633  | 4394 | 5807 | D | .    |
| RNF_120 | 4379 | 5066  | 6049 | 6878 | D | .    |
| RNF_121 | 7091 | 4851  | 4227 | 4442 | D | .    |
| RNF_122 | 98   | 66    | 2168 | 2321 | D | TRUE |
| RNF_123 | 2242 | 3263  | 4219 | 5631 | D | .    |
| RNF_124 | 3157 | 3062  | 2815 | 5928 | D | .    |
| RNF_125 | 362  | 333   | 1324 | 1296 | D | .    |
| RNF_126 | 2527 | 2035  | 2281 | 1814 | D | .    |
| RNF_127 | 4780 | 6045  | 3036 | 3034 | D | .    |
| RNF_128 | 5264 | 7624  | 3298 | 3899 | D | .    |
| RNF_129 | 2984 | 3260  | 1875 | 1593 | D | .    |



---

|         |      |      |      |      |   |      |
|---------|------|------|------|------|---|------|
| RNF_131 | 4252 | 3201 | 7604 | 7903 | D | .    |
| RNF_133 | 1427 | 1039 | 3688 | 3910 | D | .    |
| RNF_134 | 3824 | 990  | 7214 | 6999 | D | .    |
| RNF_135 | 604  | 800  | 3536 | 959  | D | .    |
| RNF_136 | 5365 | 858  | 1739 | 1494 | D | .    |
| RNF_138 | 3060 | 4052 | 4669 | 6847 | D | .    |
| RNF_139 | 3444 | 4457 | 6446 | 5079 | D | .    |
| RNF_140 | 3197 | 507  | 5524 | 5978 | D | .    |
| RNF_141 | 3683 | 4173 | 4753 | 1072 | D | .    |
| RNF_142 | 2798 | 1278 | 107  | 2610 | D | .    |
| RNF_143 | 7502 | 8895 | 7143 | 9080 | D | .    |
| RNF_144 | 193  | 142  | 6769 | 4863 | D | .    |
| RNF_145 | 1    | 371  | 162  | 3884 | D | TRUE |
| RNF_146 | 4123 | 6550 | 1961 | 8827 | D | .    |
| RNF_147 | 962  | 654  | 3436 | 3621 | D | .    |
| RNF_148 | 2806 | 3660 | 3483 | 3877 | D | .    |
| RNF_149 | 1173 | 927  | 1277 | 1269 | D | .    |
| RNF_150 | 2483 | 1417 | 6663 | 6024 | D | .    |
| RNF_151 | 1103 | 1253 | 18   | 17   | D | TRUE |
| RNF_152 | 54   | 53   | 229  | 176  | D | TRUE |
| RNF_153 | 5144 | 4410 | 5626 | 6397 | D | .    |
| RNF_154 | 3261 | 4193 | 4023 | 4331 | D | .    |
| RNF_155 | 1871 | 2347 | 1059 | 2661 | D | .    |
| RNF_156 | 718  | 397  | 567  | 599  | D | .    |
| RNF_157 | 4676 | 1109 | 4751 | 4233 | D | .    |
| RNF_158 | 580  | 625  | 2520 | 2480 | D | .    |
| RNF_159 | 4122 | 4938 | 5894 | 5099 | D | .    |
| RNF_160 | 843  | 4150 | 5843 | 7612 | D | .    |
| RNF_161 | 6199 | 6701 | 6677 | 7871 | D | .    |
| RNF_162 | 1458 | 1633 | 8001 | 7235 | D | .    |
| RNF_163 | 1480 | 836  | 4547 | 4094 | D | .    |
| RNF_164 | 5441 | 6215 | 7241 | 7267 | D | .    |
| RNF_165 | 4082 | 4721 | 975  | 1243 | D | .    |
| RNF_166 | 5439 | 5815 | 7199 | 7689 | D | .    |
| RNF_167 | 7025 | 7161 | 6153 | 7877 | D | .    |
| RNF_168 | 6703 | 7241 | 8372 | 8283 | D | .    |
| RNF_169 | 5960 | 8014 | 7334 | 8111 | D | .    |
| RNF_170 | 4916 | 3021 | 6141 | 7413 | D | .    |
| RNF_171 | 3935 | 4037 | 3470 | 5026 | D | .    |
| RNF_172 | 4617 | 4919 | 1375 | 6815 | D | .    |
| RNF_173 | 4845 | 5264 | 2605 | 3099 | D | .    |
| RNF_174 | 3541 | 2691 | 4243 | 2401 | D | .    |
| RNF_175 | 11   | 39   | 81   | 2    | D | TRUE |
| RNF_176 | 982  | 152  | 8    | 3    | D | TRUE |
| RNF_177 | 2743 | 1905 | 2015 | 3542 | D | .    |

---

|         |      |      |      |      |   |      |
|---------|------|------|------|------|---|------|
| RNF_178 | 4644 | 1184 | 1919 | 3845 | D | .    |
| RNF_179 | 659  | 352  | 356  | 714  | D | .    |
| RNF_180 | 355  | 241  | 4    | 5    | D | TRUE |
| RNF_181 | 719  | 219  | 513  | 32   | D | TRUE |
| RNF_182 | 2906 | 684  | 25   | 36   | D | TRUE |
| RNF_183 | 103  | 60   | 1287 | 1052 | D | TRUE |
| RNF_184 | 1086 | 5    | 278  | 291  | D | TRUE |
| RNF_185 | 350  | 554  | 101  | 277  | D | .    |
| RNF_186 | 120  | 128  | 8    | 5    | D | TRUE |
| RNF_187 | 86   | 24   | 64   | 24   | D | TRUE |
| RNF_189 | 1857 | 1441 | 1069 | 1159 | D | .    |
| RNF_191 | 1395 | 492  | 5304 | 5253 | D | .    |
| RNF_192 | 44   | 37   | 154  | 157  | D | TRUE |
| RNF_193 | 1523 | 2329 | 810  | 3436 | D | .    |
| RNF_194 | 1917 | 1364 | 1371 | 1799 | D | .    |
| RNF_195 | 141  | 90   | 10   | 19   | D | TRUE |
| RNF_197 | 4713 | 3298 | 651  | 1028 | D | .    |
| RNF_199 | 11   | 6    | 2    | 1    | D | TRUE |
| RNF_201 | 3384 | 4436 | 2877 | 3498 | D | .    |
| RNF_202 | 5097 | 6577 | 43   | 6268 | D | TRUE |
| RNF_203 | 2168 | 1852 | 2666 | 3115 | D | .    |
| RNF_204 | 2601 | 1099 | 5408 | 4882 | D | .    |
| RNF_206 | 20   | 9    | 90   | 564  | D | TRUE |
| RNF_207 | 10   | 19   | 3    | 620  | D | TRUE |
| RNF_208 | 3263 | 3977 | 1348 | 1644 | D | .    |
| RNF_209 | 189  | 6629 | 4384 | 6337 | D | .    |
| RNF_210 | 24   | 115  | 12   | 4    | D | TRUE |
| RNF_211 | 6015 | 7813 | 1755 | 3155 | D | .    |
| RNF_212 | 31   | 4    | 2    | 105  | D | TRUE |
| RNF_213 | 4380 | 5181 | 3236 | 2747 | D | .    |
| RNF_214 | 6248 | 7061 | 4687 | 5508 | D | .    |
| RNF_215 | 4209 | 5465 | 2486 | 2231 | D | .    |
| RNF_216 | 5070 | 5091 | 4007 | 4107 | D | .    |
| RNF_217 | 1091 | 2224 | 2362 | 4847 | D | .    |
| RNF_218 | 1902 | 1994 | 159  | 247  | D | .    |
| RNF_219 | 113  | 2    | 8    | 7168 | D | TRUE |
| RNF_220 | 1881 | 1906 | 524  | 556  | D | .    |
| RNF_221 | 799  | 667  | 1212 | 2991 | D | .    |
| RNF_223 | 85   | 28   | 3640 | 3845 | D | TRUE |
| RNF_224 | 6    | 9    | 84   | 433  | D | TRUE |
| RNF_226 | 1422 | 1743 | 2376 | 2776 | D | .    |
| RNF_229 | 822  | 618  | 589  | 652  | D | .    |
| RNF_231 | 26   | 8    | 2750 | 2391 | D | TRUE |
| RNF_234 | 38   | 8    | 33   | 5    | D | TRUE |
| RNF_235 | 1003 | 972  | 3419 | 3627 | D | .    |

|             |      |       |      |      |            |      |
|-------------|------|-------|------|------|------------|------|
| RNF_236     | 21   | 7     | 4039 | 4344 | D          | TRUE |
| RNF_239     | 925  | 1302  | 369  | 1402 | D          | .    |
| RNF_240     | 7792 | 8727  | 6179 | 7988 | D          | .    |
| RNF_241     | 5326 | 6637  | 6102 | 7075 | D          | .    |
| RNF_242     | 2850 | 2317  | 251  | 267  | D          | .    |
| RNF_243     | 40   | 13    | 42   | 32   | D          | TRUE |
| RNF_244     | 851  | 1743  | 414  | 1961 | D          | .    |
| RNF_248     | 5276 | 5072  | 5790 | 7816 | D          | .    |
| RNF_249     | 4544 | 5122  | 3474 | 3411 | D          | .    |
| RNF_251     | 7569 | 7149  | 7588 | 8956 | D          | .    |
| RNF_B10     | 5    | 205   | 22   | 2    | BlankD     | .    |
| RNF_B14     | 1    | 5     | 222  | 9    | BlankD     | .    |
| RNF_B2      | 36   | 3     | 0    | 101  | BlankD     | .    |
| RNF_B4      | 12   | 9     | 3    | 4    | BlankD     | .    |
| RNF_BS1     | 28   | 1     | 0    | 59   | BlankSweep | .    |
| RNF_S1A     | 2721 | 3433  | 3616 | 4713 | S          | .    |
| RNF_S1B     | 3892 | 5309  | 4309 | 5364 | S          | .    |
| RNF_S2      | 3683 | 3624  | 3234 | 3333 | S          | .    |
| RNF_S5      | 2182 | 3408  | 2575 | 3053 | S          | .    |
| RNF_S6A     | 4661 | 6410  | 4070 | 5612 | S          | .    |
| RNF_S6B     | 5825 | 10345 | 5076 | 6571 | S          | .    |
| RNF_S7A     | 427  | 303   | 782  | 1369 | S          | .    |
| RNF_S7B     | 5410 | 6218  | 5150 | 5301 | S          | .    |
| RNF_S7C     | 1605 | 1957  | 1033 | 1536 | S          | .    |
| RNF_S9A     | 6007 | 7438  | 4362 | 5368 | S          | .    |
| RNF_S9B     | 4957 | 7397  | 3659 | 5258 | S          | .    |
| RNF_S10A    | 4903 | 7393  | 1687 | 3377 | S          | .    |
| RNF_S10B    | 3008 | 5563  | 3720 | 5096 | S          | .    |
| RNF_S11     | 3160 | 4694  | 3595 | 4348 | S          | .    |
| RNF_S12A    | 7278 | 9584  | 6244 | 7521 | S          | .    |
| RNF_S12B    | 4373 | 4934  | 3280 | 3804 | S          | .    |
| RNF_S13A    | 5244 | 7284  | 5526 | 5081 | S          | .    |
| RNF_S13A(2) | 2998 | 3454  | 5259 | 6543 | S          | .    |
| RNF_S13B    | 3591 | 6380  | 5316 | 5434 | S          | .    |
| RNF_S13B(2) | 7771 | 7322  | 6704 | 7391 | S          | .    |
| RNF_S14     | 2422 | 2350  | 3481 | 4608 | S          | .    |
| RNF_S17     | 3510 | 3084  | 2626 | 3666 | S          | .    |
| RNF_S18A    | 6063 | 4411  | 4986 | 6718 | S          | .    |
| RNF_S18B    | 6169 | 7288  | 5871 | 6400 | S          | .    |
| RNF_S19A    | 7090 | 9155  | 7223 | 8311 | S          | .    |
| RNF_S19B    | 2419 | 4835  | 6949 | 8085 | S          | .    |
| RNF_S20A    | 2577 | 2162  | 3005 | 3604 | S          | .    |
| RNF_S20B    | 7805 | 5498  | 5901 | 6610 | S          | .    |
| RNF_S21     | 3829 | 3563  | 3740 | 3473 | S          | .    |
| RNF_S25A    | 6585 | 4753  | 4692 | 6217 | S          | .    |

---

|                           |       |      |      |       |          |   |
|---------------------------|-------|------|------|-------|----------|---|
| <b>RNF_S25B</b>           | 10220 | 6346 | 6604 | 6839  | S        | . |
| <b>RNF_S25C</b>           | 6625  | 6353 | 6693 | 6334  | S        | . |
| <b>RNF_S26A</b>           | 6577  | 5389 | 8583 | 7922  | S        | . |
| <b>RNF_S26B</b>           | 5974  | 4564 | 7523 | 8999  | S        | . |
| <b>RNF_S26C</b>           | 8655  | 7406 | 7441 | 8409  | S        | . |
| <b>RNF_S31A</b>           | 4310  | 5690 | 4514 | 4762  | S        | . |
| <b>RNF_S31B</b>           | 5959  | 4798 | 6715 | 5267  | S        | . |
| <b>RNF_S33</b>            | 6876  | 7165 | 4873 | 6014  | S        | . |
| <b>RNF_S34A</b>           | 6414  | 4449 | 6819 | 7131  | S        | . |
| <b>RNF_S34B</b>           | 6350  | 6948 | 6825 | 7253  | S        | . |
| <b>RNF_S34C</b>           | 7882  | 3835 | 7449 | 10340 | S        | . |
| <b>RNF_S35</b>            | 4734  | 4591 | 1695 | 3005  | S        | . |
| <b>RNF_S36</b>            | 5852  | 5626 | 4809 | 4297  | S        | . |
| <b>RNF_Seq<br/>Blanc1</b> | 3     | 1    | 3    | 19    | Blankseq | . |
| <b>RNF_Seq<br/>Blanc2</b> | 2     | 1    | 4    | 8     | Blankseq | . |
| <b>RNF_Seq<br/>Blanc3</b> | 24    | 4    | 22   | 8     | Blankseq | . |
| <b>RNF_Seq<br/>Blanc4</b> | 10    | 8    | 3    | 162   | Blankseq | . |
| <b>RNF_Seq<br/>Blanc5</b> | 6     | 1    | 4    | 125   | Blankseq | . |

---

**Table S4** – BINs removed from specific samples based on their presence in Extraction blanks. These samples had less than 10 times more reads than in blanks.

| <b>BIN</b>          | <b>Sample</b> | <b>Order</b> | <b>Family</b> | <b>Genus</b> | <b>Species</b>                        |
|---------------------|---------------|--------------|---------------|--------------|---------------------------------------|
| <b>BOLD:AAB9618</b> | RNF_175       | Lepidoptera  | Crambidae     | Pyrausta     | Pyrausta despicata                    |
| <b>BOLD:AAB9618</b> | RNF_240       | Lepidoptera  | Crambidae     | Pyrausta     | Pyrausta despicata                    |
| <b>BOLD:AAD0642</b> | RNF_240       | Diptera      | Muscidae      | Helina       | Helina duplicata, Helina reversio     |
| <b>BOLD:AAD0642</b> | RNF_249       | Diptera      | Muscidae      | Helina       | Helina duplicata, Helina reversio     |
| <b>BOLD:AAH3467</b> | RNF_249       | Hymenoptera  | Braconidae    | Homolobus    |                                       |
| <b>BOLD:AAH3467</b> | RNF_249       | Hymenoptera  | Braconidae    | Homolobus    |                                       |
| <b>BOLD:AAP2403</b> | RNF_147       | Araneae      | Philodromidae | Philodromus  | Philodromus dispar                    |
| <b>BOLD:AAP2403</b> | RNF_147       | Araneae      | Philodromidae | Philodromus  | Philodromus dispar                    |
| <b>BOLD:AAP2403</b> | RNF_147       | Araneae      | Philodromidae | Philodromus  | Philodromus dispar                    |
| <b>BOLD:AAP2403</b> | RNF_147       | Araneae      | Philodromidae | Philodromus  | Philodromus dispar                    |
| <b>BOLD:AAP2403</b> | RNF_148       | Araneae      | Philodromidae | Philodromus  | Philodromus dispar                    |
| <b>BOLD:AAP2403</b> | RNF_175       | Araneae      | Philodromidae | Philodromus  | Philodromus dispar                    |
| <b>BOLD:AAP2403</b> | RNF_176       | Araneae      | Philodromidae | Philodromus  | Philodromus dispar                    |
| <b>BOLD:AAP2403</b> | RNF_178       | Araneae      | Philodromidae | Philodromus  | Philodromus dispar                    |
| <b>BOLD:AAP2403</b> | RNF_239       | Araneae      | Philodromidae | Philodromus  | Philodromus dispar                    |
| <b>BOLD:AAP2403</b> | RNF_240       | Araneae      | Philodromidae | Philodromus  | Philodromus dispar                    |
| <b>BOLD:ACB4574</b> | RNF_147       | Diptera      | Lauxaniidae   | Calliopum    | Calliopum aeneum                      |
| <b>BOLD:ACB4575</b> | RNF_242       | Diptera      | Lauxaniidae   | Calliopum    | Calliopum elisae                      |
| <b>BOLD:ACD2919</b> | RNF_240       | Diptera      | Anthomyiidae  | Delia        | Delia penicillosa, Delia penicillaris |
| <b>BOLD:ACL7274</b> | RNF_129       | Blattodea    | Ectobiidae    | Ectobius     | Ectobius pallidus                     |
| <b>BOLD:ACL7274</b> | RNF_129       | Blattodea    | Ectobiidae    | Ectobius     | Ectobius pallidus                     |

**Table S5** – BINs removed from specific samples and run based on their presence in sequencing blanks. These samples had less than 10 times more reads than in blanks.

| <b>BIN</b>          | <b>Sample</b> | <b>Run</b> | <b>Order</b> | <b>Genus</b> | <b>Species</b>                                      |
|---------------------|---------------|------------|--------------|--------------|-----------------------------------------------------|
| <b>BOLD:AAB9618</b> | RNF_9         | ZBJ_2      | Lepidoptera  | Pyrausta     | Pyrausta despicata                                  |
| <b>BOLD:AAB9618</b> | RNF_16        | ZBJ_2      | Lepidoptera  | Pyrausta     | Pyrausta despicata                                  |
| <b>BOLD:AAB9618</b> | RNF_25        | ZBJ_2      | Lepidoptera  | Pyrausta     | Pyrausta despicata                                  |
| <b>BOLD:AAB9618</b> | RNF_26        | ZBJ_2      | Lepidoptera  | Pyrausta     | Pyrausta despicata                                  |
| <b>BOLD:AAB9618</b> | RNF_29        | ZBJ_2      | Lepidoptera  | Pyrausta     | Pyrausta despicata                                  |
| <b>BOLD:AAB9618</b> | RNF_49        | ZBJ_2      | Lepidoptera  | Pyrausta     | Pyrausta despicata                                  |
| <b>BOLD:AAB9618</b> | RNF_57        | ZBJ_2      | Lepidoptera  | Pyrausta     | Pyrausta despicata                                  |
| <b>BOLD:AAB9618</b> | RNF_81        | ZBJ_2      | Lepidoptera  | Pyrausta     | Pyrausta despicata                                  |
| <b>BOLD:AAB9618</b> | RNF_82        | ZBJ_2      | Lepidoptera  | Pyrausta     | Pyrausta despicata                                  |
| <b>BOLD:AAB9618</b> | RNF_113       | ZBJ_2      | Lepidoptera  | Pyrausta     | Pyrausta despicata                                  |
| <b>BOLD:AAB9618</b> | RNF_162       | ZBJ_2      | Lepidoptera  | Pyrausta     | Pyrausta despicata                                  |
| <b>BOLD:AAB9618</b> | RNF_169       | ZBJ_2      | Lepidoptera  | Pyrausta     | Pyrausta despicata                                  |
| <b>BOLD:AAB9618</b> | RNF_197       | ZBJ_2      | Lepidoptera  | Pyrausta     | Pyrausta despicata                                  |
| <b>BOLD:AAB9618</b> | RNF_204       | ZBJ_2      | Lepidoptera  | Pyrausta     | Pyrausta despicata                                  |
| <b>BOLD:AAB9618</b> | RNF_207       | ZBJ_2      | Lepidoptera  | Pyrausta     | Pyrausta despicata                                  |
| <b>BOLD:AAC1503</b> | RNF_16        | ZBJ_2      | Trichoptera  | Limnephilus  | Limnephilus graecus, Limnephilus lunatus            |
| <b>BOLD:AAC1503</b> | RNF_57        | ZBJ_2      | Trichoptera  | Limnephilus  | Limnephilus graecus, Limnephilus lunatus            |
| <b>BOLD:AAC1503</b> | RNF_169       | ZBJ_2      | Trichoptera  | Limnephilus  | Limnephilus graecus, Limnephilus lunatus            |
| <b>BOLD:AAC1503</b> | RNF_207       | ZBJ_2      | Trichoptera  | Limnephilus  | Limnephilus graecus, Limnephilus lunatus            |
| <b>BOLD:AAC2028</b> | RNF_109       | ZBJ_1      | Lepidoptera  | Udea         | Udea prunalis                                       |
| <b>BOLD:AAC5906</b> | RNF_24        | ZBJ_1      | Lepidoptera  | Endotricha   | Endotricha flammealis                               |
| <b>BOLD:AAC5906</b> | RNF_144       | ZBJ_1      | Lepidoptera  | Endotricha   | Endotricha flammealis                               |
| <b>BOLD:AAC5906</b> | RNF_159       | ZBJ_1      | Lepidoptera  | Endotricha   | Endotricha flammealis                               |
| <b>BOLD:AAC5906</b> | RNF_187       | ZBJ_1      | Lepidoptera  | Endotricha   | Endotricha flammealis                               |
| <b>BOLD:AAC5906</b> | RNF_209       | ZBJ_1      | Lepidoptera  | Endotricha   | Endotricha flammealis                               |
| <b>BOLD:AAC5906</b> | RNF_248       | ZBJ_1      | Lepidoptera  | Endotricha   | Endotricha flammealis                               |
| <b>BOLD:AAE6869</b> | RNF_121       | ANML_2     | Lepidoptera  | Agriphila    | Agriphila geniculea, Agriphila tolli, Agriphila sp. |
| <b>BOLD:AAF5224</b> | RNF_40        | ZBJ_2      | Araneae      | Linyphia     | Linyphia tenuipalpis                                |
| <b>BOLD:AAF5224</b> | RNF_68        | ZBJ_2      | Araneae      | Linyphia     | Linyphia tenuipalpis                                |
| <b>BOLD:AAF5224</b> | RNF_81        | ZBJ_2      | Araneae      | Linyphia     | Linyphia tenuipalpis                                |
| <b>BOLD:AAF5224</b> | RNF_118       | ZBJ_2      | Araneae      | Linyphia     | Linyphia tenuipalpis                                |
| <b>BOLD:AAF5224</b> | RNF_167       | ZBJ_2      | Araneae      | Linyphia     | Linyphia tenuipalpis                                |
| <b>BOLD:AAF5224</b> | RNF_171       | ZBJ_2      | Araneae      | Linyphia     | Linyphia tenuipalpis                                |
| <b>BOLD:AAF5224</b> | RNF_207       | ZBJ_2      | Araneae      | Linyphia     | Linyphia tenuipalpis                                |
| <b>BOLD:AAF5224</b> | RNF_214       | ZBJ_2      | Araneae      | Linyphia     | Linyphia tenuipalpis                                |
| <b>BOLD:AAF5224</b> | RNF_231       | ZBJ_2      | Araneae      | Linyphia     | Linyphia tenuipalpis                                |
| <b>BOLD:AAF5224</b> | RNF_241       | ZBJ_2      | Araneae      | Linyphia     | Linyphia tenuipalpis                                |

---

|                     |         |       |         |          |                      |
|---------------------|---------|-------|---------|----------|----------------------|
| <b>BOLD:AAF5224</b> | RNF_248 | ZBJ_2 | Araneae | Linyphia | Linyphia tenuipalpis |
| <b>BOLD:AAF5224</b> | RNF_251 | ZBJ_2 | Araneae | Linyphia | Linyphia tenuipalpis |
| <b>BOLD:AAF9059</b> | RNF_9   | ZBJ_2 | Diptera | Rhipidia | Rhipidia maculata    |
| <b>BOLD:AAF9059</b> | RNF_16  | ZBJ_2 | Diptera | Rhipidia | Rhipidia maculata    |
| <b>BOLD:AAF9059</b> | RNF_25  | ZBJ_2 | Diptera | Rhipidia | Rhipidia maculata    |
| <b>BOLD:AAF9059</b> | RNF_26  | ZBJ_2 | Diptera | Rhipidia | Rhipidia maculata    |
| <b>BOLD:AAF9059</b> | RNF_49  | ZBJ_2 | Diptera | Rhipidia | Rhipidia maculata    |
| <b>BOLD:AAF9059</b> | RNF_57  | ZBJ_2 | Diptera | Rhipidia | Rhipidia maculata    |
| <b>BOLD:AAF9059</b> | RNF_81  | ZBJ_2 | Diptera | Rhipidia | Rhipidia maculata    |
| <b>BOLD:AAF9059</b> | RNF_113 | ZBJ_2 | Diptera | Rhipidia | Rhipidia maculata    |
| <b>BOLD:AAF9059</b> | RNF_157 | ZBJ_2 | Diptera | Rhipidia | Rhipidia maculata    |
| <b>BOLD:AAF9059</b> | RNF_159 | ZBJ_2 | Diptera | Rhipidia | Rhipidia maculata    |
| <b>BOLD:AAF9059</b> | RNF_162 | ZBJ_2 | Diptera | Rhipidia | Rhipidia maculata    |
| <b>BOLD:AAF9059</b> | RNF_169 | ZBJ_2 | Diptera | Rhipidia | Rhipidia maculata    |
| <b>BOLD:AAF9059</b> | RNF_197 | ZBJ_2 | Diptera | Rhipidia | Rhipidia maculata    |
| <b>BOLD:AAF9059</b> | RNF_207 | ZBJ_2 | Diptera | Rhipidia | Rhipidia maculata    |
| <b>BOLD:AAF9059</b> | RNF_240 | ZBJ_2 | Diptera | Rhipidia | Rhipidia maculata    |
| <b>BOLD:AAF9059</b> | RNF_251 | ZBJ_2 | Diptera | Rhipidia | Rhipidia maculata    |
| <b>BOLD:AAG2511</b> | RNF_6   | ZBJ_2 | Diptera | Delia    | Delia platara        |
| <b>BOLD:AAG2511</b> | RNF_9   | ZBJ_2 | Diptera | Delia    | Delia platara        |
| <b>BOLD:AAG2511</b> | RNF_10  | ZBJ_2 | Diptera | Delia    | Delia platara        |
| <b>BOLD:AAG2511</b> | RNF_16  | ZBJ_2 | Diptera | Delia    | Delia platara        |
| <b>BOLD:AAG2511</b> | RNF_26  | ZBJ_2 | Diptera | Delia    | Delia platara        |
| <b>BOLD:AAG2511</b> | RNF_33  | ZBJ_2 | Diptera | Delia    | Delia platara        |
| <b>BOLD:AAG2511</b> | RNF_46  | ZBJ_2 | Diptera | Delia    | Delia platara        |
| <b>BOLD:AAG2511</b> | RNF_49  | ZBJ_2 | Diptera | Delia    | Delia platara        |
| <b>BOLD:AAG2511</b> | RNF_53  | ZBJ_2 | Diptera | Delia    | Delia platara        |
| <b>BOLD:AAG2511</b> | RNF_57  | ZBJ_2 | Diptera | Delia    | Delia platara        |
| <b>BOLD:AAG2511</b> | RNF_77  | ZBJ_2 | Diptera | Delia    | Delia platara        |
| <b>BOLD:AAG2511</b> | RNF_87  | ZBJ_2 | Diptera | Delia    | Delia platara        |
| <b>BOLD:AAG2511</b> | RNF_95  | ZBJ_2 | Diptera | Delia    | Delia platara        |
| <b>BOLD:AAG2511</b> | RNF_115 | ZBJ_2 | Diptera | Delia    | Delia platara        |
| <b>BOLD:AAG2511</b> | RNF_116 | ZBJ_2 | Diptera | Delia    | Delia platara        |
| <b>BOLD:AAG2511</b> | RNF_121 | ZBJ_2 | Diptera | Delia    | Delia platara        |
| <b>BOLD:AAG2511</b> | RNF_124 | ZBJ_2 | Diptera | Delia    | Delia platara        |
| <b>BOLD:AAG2511</b> | RNF_126 | ZBJ_2 | Diptera | Delia    | Delia platara        |
| <b>BOLD:AAG2511</b> | RNF_127 | ZBJ_2 | Diptera | Delia    | Delia platara        |
| <b>BOLD:AAG2511</b> | RNF_128 | ZBJ_2 | Diptera | Delia    | Delia platara        |
| <b>BOLD:AAG2511</b> | RNF_131 | ZBJ_2 | Diptera | Delia    | Delia platara        |
| <b>BOLD:AAG2511</b> | RNF_149 | ZBJ_2 | Diptera | Delia    | Delia platara        |
| <b>BOLD:AAG2511</b> | RNF_161 | ZBJ_2 | Diptera | Delia    | Delia platara        |
| <b>BOLD:AAG2511</b> | RNF_162 | ZBJ_2 | Diptera | Delia    | Delia platara        |
| <b>BOLD:AAG2511</b> | RNF_169 | ZBJ_2 | Diptera | Delia    | Delia platara        |
| <b>BOLD:AAG2511</b> | RNF_178 | ZBJ_2 | Diptera | Delia    | Delia platara        |
| <b>BOLD:AAG2511</b> | RNF_194 | ZBJ_2 | Diptera | Delia    | Delia platara        |

---

---

|                     |         |        |         |             |                      |
|---------------------|---------|--------|---------|-------------|----------------------|
| <b>BOLD:AAG2511</b> | RNF_195 | ZBJ_2  | Diptera | Delia       | Delia platura        |
| <b>BOLD:AAG2511</b> | RNF_207 | ZBJ_2  | Diptera | Delia       | Delia platura        |
| <b>BOLD:AAG2511</b> | RNF_215 | ZBJ_2  | Diptera | Delia       | Delia platura        |
| <b>BOLD:AAG2511</b> | RNF_224 | ZBJ_2  | Diptera | Delia       | Delia platura        |
| <b>BOLD:AAG2511</b> | RNF_229 | ZBJ_2  | Diptera | Delia       | Delia platura        |
| <b>BOLD:AAH4103</b> | RNF_16  | ZBJ_2  | Isopoda | Philoscia   | Philoscia muscorum   |
| <b>BOLD:AAH4103</b> | RNF_57  | ZBJ_2  | Isopoda | Philoscia   | Philoscia muscorum   |
| <b>BOLD:AAH4103</b> | RNF_81  | ZBJ_2  | Isopoda | Philoscia   | Philoscia muscorum   |
| <b>BOLD:AAH4103</b> | RNF_105 | ZBJ_2  | Isopoda | Philoscia   | Philoscia muscorum   |
| <b>BOLD:AAH4103</b> | RNF_113 | ZBJ_2  | Isopoda | Philoscia   | Philoscia muscorum   |
| <b>BOLD:AAH4103</b> | RNF_168 | ZBJ_2  | Isopoda | Philoscia   | Philoscia muscorum   |
| <b>BOLD:AAH4103</b> | RNF_219 | ZBJ_2  | Isopoda | Philoscia   | Philoscia muscorum   |
| <b>BOLD:AAJ4117</b> | RNF_161 | ZBJ_2  | Araneae | Clubiona    | Clubiona terrestris  |
| <b>BOLD:AAJ4117</b> | RNF_167 | ZBJ_2  | Araneae | Clubiona    | Clubiona terrestris  |
| <b>BOLD:AAJ4117</b> | RNF_207 | ZBJ_2  | Araneae | Clubiona    | Clubiona terrestris  |
| <b>BOLD:AAJ4117</b> | RNF_208 | ZBJ_2  | Araneae | Clubiona    | Clubiona terrestris  |
| <b>BOLD:AAJ4117</b> | RNF_226 | ZBJ_2  | Araneae | Clubiona    | Clubiona terrestris  |
| <b>BOLD:AAJ4117</b> | RNF_240 | ZBJ_2  | Araneae | Clubiona    | Clubiona terrestris  |
| <b>BOLD:AAJ4117</b> | RNF_251 | ZBJ_2  | Araneae | Clubiona    | Clubiona terrestris  |
| <b>BOLD:AAO3252</b> | RNF_16  | ZBJ_2  | Araneae | Anyphaena   | Anyphaena accentuata |
| <b>BOLD:AAO3252</b> | RNF_25  | ZBJ_2  | Araneae | Anyphaena   | Anyphaena accentuata |
| <b>BOLD:AAO3252</b> | RNF_57  | ZBJ_2  | Araneae | Anyphaena   | Anyphaena accentuata |
| <b>BOLD:AAO3252</b> | RNF_69  | ZBJ_2  | Araneae | Anyphaena   | Anyphaena accentuata |
| <b>BOLD:AAO3252</b> | RNF_71  | ZBJ_2  | Araneae | Anyphaena   | Anyphaena accentuata |
| <b>BOLD:AAO3252</b> | RNF_81  | ZBJ_2  | Araneae | Anyphaena   | Anyphaena accentuata |
| <b>BOLD:AAO3252</b> | RNF_105 | ZBJ_2  | Araneae | Anyphaena   | Anyphaena accentuata |
| <b>BOLD:AAO3252</b> | RNF_113 | ZBJ_2  | Araneae | Anyphaena   | Anyphaena accentuata |
| <b>BOLD:AAO3252</b> | RNF_159 | ZBJ_2  | Araneae | Anyphaena   | Anyphaena accentuata |
| <b>BOLD:AAO3252</b> | RNF_163 | ZBJ_2  | Araneae | Anyphaena   | Anyphaena accentuata |
| <b>BOLD:AAO3252</b> | RNF_164 | ZBJ_2  | Araneae | Anyphaena   | Anyphaena accentuata |
| <b>BOLD:AAO3252</b> | RNF_165 | ZBJ_2  | Araneae | Anyphaena   | Anyphaena accentuata |
| <b>BOLD:AAO3252</b> | RNF_251 | ZBJ_2  | Araneae | Anyphaena   | Anyphaena accentuata |
| <b>BOLD:AAO4492</b> | RNF_149 | ANML_1 | Araneae | Episinus    | Episinus maculipes   |
| <b>BOLD:AAO4492</b> | RNF_167 | ANML_1 | Araneae | Episinus    | Episinus maculipes   |
| <b>BOLD:AAO4492</b> | RNF_169 | ANML_1 | Araneae | Episinus    | Episinus maculipes   |
| <b>BOLD:AAP2403</b> | RNF_5   | ANML_1 | Araneae | Philodromus | Philodromus dispar   |
| <b>BOLD:AAP2403</b> | RNF_9   | ANML_1 | Araneae | Philodromus | Philodromus dispar   |
| <b>BOLD:AAP2403</b> | RNF_11  | ANML_1 | Araneae | Philodromus | Philodromus dispar   |
| <b>BOLD:AAP2403</b> | RNF_12  | ANML_1 | Araneae | Philodromus | Philodromus dispar   |
| <b>BOLD:AAP2403</b> | RNF_16  | ANML_1 | Araneae | Philodromus | Philodromus dispar   |
| <b>BOLD:AAP2403</b> | RNF_35  | ANML_1 | Araneae | Philodromus | Philodromus dispar   |
| <b>BOLD:AAP2403</b> | RNF_49  | ANML_1 | Araneae | Philodromus | Philodromus dispar   |
| <b>BOLD:AAP2403</b> | RNF_52  | ANML_1 | Araneae | Philodromus | Philodromus dispar   |
| <b>BOLD:AAP2403</b> | RNF_53  | ANML_1 | Araneae | Philodromus | Philodromus dispar   |
| <b>BOLD:AAP2403</b> | RNF_58  | ANML_1 | Araneae | Philodromus | Philodromus dispar   |

---



---

|                     |         |        |             |             |                                      |
|---------------------|---------|--------|-------------|-------------|--------------------------------------|
| <b>BOLD:AAP2403</b> | RNF_65  | ANML_1 | Araneae     | Philodromus | Philodromus dispar                   |
| <b>BOLD:AAP2403</b> | RNF_71  | ANML_1 | Araneae     | Philodromus | Philodromus dispar                   |
| <b>BOLD:AAP2403</b> | RNF_83  | ANML_1 | Araneae     | Philodromus | Philodromus dispar                   |
| <b>BOLD:AAP2403</b> | RNF_94  | ANML_1 | Araneae     | Philodromus | Philodromus dispar                   |
| <b>BOLD:AAP2403</b> | RNF_103 | ANML_1 | Araneae     | Philodromus | Philodromus dispar                   |
| <b>BOLD:AAP2403</b> | RNF_106 | ANML_1 | Araneae     | Philodromus | Philodromus dispar                   |
| <b>BOLD:AAP2403</b> | RNF_113 | ANML_1 | Araneae     | Philodromus | Philodromus dispar                   |
| <b>BOLD:AAP2403</b> | RNF_133 | ANML_1 | Araneae     | Philodromus | Philodromus dispar                   |
| <b>BOLD:AAP2403</b> | RNF_134 | ANML_1 | Araneae     | Philodromus | Philodromus dispar                   |
| <b>BOLD:AAP2403</b> | RNF_141 | ANML_1 | Araneae     | Philodromus | Philodromus dispar                   |
| <b>BOLD:AAP2403</b> | RNF_143 | ANML_1 | Araneae     | Philodromus | Philodromus dispar                   |
| <b>BOLD:AAP2403</b> | RNF_148 | ANML_1 | Araneae     | Philodromus | Philodromus dispar                   |
| <b>BOLD:AAP2403</b> | RNF_164 | ANML_1 | Araneae     | Philodromus | Philodromus dispar                   |
| <b>BOLD:AAP2403</b> | RNF_174 | ANML_1 | Araneae     | Philodromus | Philodromus dispar                   |
| <b>BOLD:AAP2403</b> | RNF_187 | ANML_1 | Araneae     | Philodromus | Philodromus dispar                   |
| <b>BOLD:AAP2403</b> | RNF_191 | ANML_1 | Araneae     | Philodromus | Philodromus dispar                   |
| <b>BOLD:AAP2403</b> | RNF_204 | ANML_1 | Araneae     | Philodromus | Philodromus dispar                   |
| <b>BOLD:AAP2403</b> | RNF_208 | ANML_1 | Araneae     | Philodromus | Philodromus dispar                   |
| <b>BOLD:AAP2403</b> | RNF_210 | ANML_1 | Araneae     | Philodromus | Philodromus dispar                   |
| <b>BOLD:AAP2403</b> | RNF_211 | ANML_1 | Araneae     | Philodromus | Philodromus dispar                   |
| <b>BOLD:AAP2403</b> | RNF_218 | ANML_1 | Araneae     | Philodromus | Philodromus dispar                   |
| <b>BOLD:AAP2403</b> | RNF_219 | ANML_1 | Araneae     | Philodromus | Philodromus dispar                   |
| <b>BOLD:AAP2403</b> | RNF_243 | ANML_1 | Araneae     | Philodromus | Philodromus dispar                   |
| <b>BOLD:AAP2403</b> | RNF_249 | ANML_1 | Araneae     | Philodromus | Philodromus dispar                   |
| <b>BOLD:AAP2825</b> | RNF_50  | ZBJ_2  | Diptera     | Pollenia    | Pollenia angustigena, Pollenia rudis |
| <b>BOLD:AAP2825</b> | RNF_53  | ZBJ_2  | Diptera     | Pollenia    | Pollenia angustigena, Pollenia rudis |
| <b>BOLD:AAP2825</b> | RNF_57  | ZBJ_2  | Diptera     | Pollenia    | Pollenia angustigena, Pollenia rudis |
| <b>BOLD:AAP2825</b> | RNF_82  | ZBJ_2  | Diptera     | Pollenia    | Pollenia angustigena, Pollenia rudis |
| <b>BOLD:AAP2825</b> | RNF_114 | ZBJ_2  | Diptera     | Pollenia    | Pollenia angustigena, Pollenia rudis |
| <b>BOLD:AAP2825</b> | RNF_116 | ZBJ_2  | Diptera     | Pollenia    | Pollenia angustigena, Pollenia rudis |
| <b>BOLD:AAP2825</b> | RNF_118 | ZBJ_2  | Diptera     | Pollenia    | Pollenia angustigena, Pollenia rudis |
| <b>BOLD:AAP2825</b> | RNF_120 | ZBJ_2  | Diptera     | Pollenia    | Pollenia angustigena, Pollenia rudis |
| <b>BOLD:AAP2825</b> | RNF_127 | ZBJ_2  | Diptera     | Pollenia    | Pollenia angustigena, Pollenia rudis |
| <b>BOLD:AAP2825</b> | RNF_169 | ZBJ_2  | Diptera     | Pollenia    | Pollenia angustigena, Pollenia rudis |
| <b>BOLD:AAP2825</b> | RNF_207 | ZBJ_2  | Diptera     | Pollenia    | Pollenia angustigena, Pollenia rudis |
| <b>BOLD:AAU3916</b> | RNF_207 | ZBJ_2  | Lepidoptera | Telphusa    | Telphusa cistiflorella               |
| <b>BOLD:ABA6492</b> | RNF_16  | ZBJ_2  | Diptera     | Hylemya     | Hylemya vagans, Hylemya nigrimana    |
| <b>BOLD:ABA6492</b> | RNF_25  | ZBJ_2  | Diptera     | Hylemya     | Hylemya vagans, Hylemya nigrimana    |
| <b>BOLD:ABA6492</b> | RNF_57  | ZBJ_2  | Diptera     | Hylemya     | Hylemya vagans, Hylemya nigrimana    |
| <b>BOLD:ABA6492</b> | RNF_81  | ZBJ_2  | Diptera     | Hylemya     | Hylemya vagans, Hylemya nigrimana    |
| <b>BOLD:ABA6492</b> | RNF_169 | ZBJ_2  | Diptera     | Hylemya     | Hylemya vagans, Hylemya nigrimana    |

---

|                     |         |       |             |            |                                         |
|---------------------|---------|-------|-------------|------------|-----------------------------------------|
| <b>BOLD:ABA6492</b> | RNF_207 | ZBJ_2 | Diptera     | Hylemya    | Hylemya vagans, Hylemya nigrimana       |
| <b>BOLD:ABA6492</b> | RNF_208 | ZBJ_2 | Diptera     | Hylemya    | Hylemya vagans, Hylemya nigrimana       |
| <b>BOLD:ABA6492</b> | RNF_215 | ZBJ_2 | Diptera     | Hylemya    | Hylemya vagans, Hylemya nigrimana       |
| <b>BOLD:ABA6492</b> | RNF_216 | ZBJ_2 | Diptera     | Hylemya    | Hylemya vagans, Hylemya nigrimana       |
| <b>BOLD:ABA6492</b> | RNF_224 | ZBJ_2 | Diptera     | Hylemya    | Hylemya vagans, Hylemya nigrimana       |
| <b>BOLD:ABA6492</b> | RNF_226 | ZBJ_2 | Diptera     | Hylemya    | Hylemya vagans, Hylemya nigrimana       |
| <b>BOLD:ABA6492</b> | RNF_231 | ZBJ_2 | Diptera     | Hylemya    | Hylemya vagans, Hylemya nigrimana       |
| <b>BOLD:ABA6492</b> | RNF_240 | ZBJ_2 | Diptera     | Hylemya    | Hylemya vagans, Hylemya nigrimana       |
| <b>BOLD:ABA6492</b> | RNF_241 | ZBJ_2 | Diptera     | Hylemya    | Hylemya vagans, Hylemya nigrimana       |
| <b>BOLD:ABA6492</b> | RNF_251 | ZBJ_2 | Diptera     | Hylemya    | Hylemya vagans, Hylemya nigrimana       |
| <b>BOLD:ABX4957</b> | RNF_16  | ZBJ_2 | Lepidoptera | Cyclophora | Cyclophora ruficiliaria                 |
| <b>BOLD:ABX4957</b> | RNF_57  | ZBJ_2 | Lepidoptera | Cyclophora | Cyclophora ruficiliaria                 |
| <b>BOLD:ABX4957</b> | RNF_81  | ZBJ_2 | Lepidoptera | Cyclophora | Cyclophora ruficiliaria                 |
| <b>BOLD:ABX4957</b> | RNF_91  | ZBJ_2 | Lepidoptera | Cyclophora | Cyclophora ruficiliaria                 |
| <b>BOLD:ABX4957</b> | RNF_113 | ZBJ_2 | Lepidoptera | Cyclophora | Cyclophora ruficiliaria                 |
| <b>BOLD:ABX4957</b> | RNF_215 | ZBJ_2 | Lepidoptera | Cyclophora | Cyclophora ruficiliaria                 |
| <b>BOLD:ABX4957</b> | RNF_224 | ZBJ_2 | Lepidoptera | Cyclophora | Cyclophora ruficiliaria                 |
| <b>BOLD:ABX4957</b> | RNF_231 | ZBJ_2 | Lepidoptera | Cyclophora | Cyclophora ruficiliaria                 |
| <b>BOLD:ABX4957</b> | RNF_240 | ZBJ_2 | Lepidoptera | Cyclophora | Cyclophora ruficiliaria                 |
| <b>BOLD:ABX4957</b> | RNF_251 | ZBJ_2 | Lepidoptera | Cyclophora | Cyclophora ruficiliaria                 |
| <b>BOLD:ACB4574</b> | RNF_57  | ZBJ_2 | Diptera     | Calliopum  | Calliopum aeneum                        |
| <b>BOLD:ACB4574</b> | RNF_69  | ZBJ_2 | Diptera     | Calliopum  | Calliopum aeneum                        |
| <b>BOLD:ACB4574</b> | RNF_82  | ZBJ_2 | Diptera     | Calliopum  | Calliopum aeneum                        |
| <b>BOLD:ACB4574</b> | RNF_87  | ZBJ_2 | Diptera     | Calliopum  | Calliopum aeneum                        |
| <b>BOLD:ACB4574</b> | RNF_95  | ZBJ_2 | Diptera     | Calliopum  | Calliopum aeneum                        |
| <b>BOLD:ACB4574</b> | RNF_102 | ZBJ_2 | Diptera     | Calliopum  | Calliopum aeneum                        |
| <b>BOLD:ACB4574</b> | RNF_123 | ZBJ_2 | Diptera     | Calliopum  | Calliopum aeneum                        |
| <b>BOLD:ACB4574</b> | RNF_126 | ZBJ_2 | Diptera     | Calliopum  | Calliopum aeneum                        |
| <b>BOLD:ACB4574</b> | RNF_128 | ZBJ_2 | Diptera     | Calliopum  | Calliopum aeneum                        |
| <b>BOLD:ACB4574</b> | RNF_131 | ZBJ_2 | Diptera     | Calliopum  | Calliopum aeneum                        |
| <b>BOLD:ACB4574</b> | RNF_134 | ZBJ_2 | Diptera     | Calliopum  | Calliopum aeneum                        |
| <b>BOLD:ACB4574</b> | RNF_136 | ZBJ_2 | Diptera     | Calliopum  | Calliopum aeneum                        |
| <b>BOLD:ACB4574</b> | RNF_161 | ZBJ_2 | Diptera     | Calliopum  | Calliopum aeneum                        |
| <b>BOLD:ACB4574</b> | RNF_207 | ZBJ_2 | Diptera     | Calliopum  | Calliopum aeneum                        |
| <b>BOLD:ACB4574</b> | RNF_209 | ZBJ_2 | Diptera     | Calliopum  | Calliopum aeneum                        |
| <b>BOLD:ACD9629</b> | RNF_81  | ZBJ_2 | Diptera     | Stevenia   | Stevenia deceptoria, Stevenia umbratica |
| <b>BOLD:ACD9629</b> | RNF_97  | ZBJ_2 | Diptera     | Stevenia   | Stevenia deceptoria, Stevenia umbratica |

|                     |         |        |             |          |                                         |
|---------------------|---------|--------|-------------|----------|-----------------------------------------|
| <b>BOLD:ACD9629</b> | RNF_162 | ZBJ_2  | Diptera     | Stevenia | Stevenia deceptoria, Stevenia umbratica |
| <b>BOLD:ACD9629</b> | RNF_197 | ZBJ_2  | Diptera     | Stevenia | Stevenia deceptoria, Stevenia umbratica |
| <b>BOLD:ACD9629</b> | RNF_240 | ZBJ_2  | Diptera     | Stevenia | Stevenia deceptoria, Stevenia umbratica |
| <b>BOLD:ACD9629</b> | RNF_251 | ZBJ_2  | Diptera     | Stevenia | Stevenia deceptoria, Stevenia umbratica |
| <b>BOLD:ACF3089</b> | RNF_5   | ANML_2 | Lepidoptera | Agrotis  | Agrotis crassa, Agrotis bigramma        |
| <b>BOLD:ACF3089</b> | RNF_14  | ANML_2 | Lepidoptera | Agrotis  | Agrotis crassa, Agrotis bigramma        |
| <b>BOLD:ACF3089</b> | RNF_25  | ZBJ_2  | Lepidoptera | Agrotis  | Agrotis crassa, Agrotis bigramma        |
| <b>BOLD:ACF3089</b> | RNF_26  | ZBJ_2  | Lepidoptera | Agrotis  | Agrotis crassa, Agrotis bigramma        |
| <b>BOLD:ACF3089</b> | RNF_40  | ZBJ_2  | Lepidoptera | Agrotis  | Agrotis crassa, Agrotis bigramma        |
| <b>BOLD:ACF3089</b> | RNF_45  | ANML_2 | Lepidoptera | Agrotis  | Agrotis crassa, Agrotis bigramma        |
| <b>BOLD:ACF3089</b> | RNF_76  | ANML_2 | Lepidoptera | Agrotis  | Agrotis crassa, Agrotis bigramma        |
| <b>BOLD:ACF3089</b> | RNF_82  | ZBJ_2  | Lepidoptera | Agrotis  | Agrotis crassa, Agrotis bigramma        |
| <b>BOLD:ACF3089</b> | RNF_95  | ANML_2 | Lepidoptera | Agrotis  | Agrotis crassa, Agrotis bigramma        |
| <b>BOLD:ACF3089</b> | RNF_113 | ZBJ_2  | Lepidoptera | Agrotis  | Agrotis crassa, Agrotis bigramma        |
| <b>BOLD:ACF3089</b> | RNF_114 | ZBJ_2  | Lepidoptera | Agrotis  | Agrotis crassa, Agrotis bigramma        |
| <b>BOLD:ACF3089</b> | RNF_139 | ANML_2 | Lepidoptera | Agrotis  | Agrotis crassa, Agrotis bigramma        |
| <b>BOLD:ACF3089</b> | RNF_158 | ANML_2 | Lepidoptera | Agrotis  | Agrotis crassa, Agrotis bigramma        |
| <b>BOLD:ACF3089</b> | RNF_169 | ZBJ_2  | Lepidoptera | Agrotis  | Agrotis crassa, Agrotis bigramma        |
| <b>BOLD:ACF3089</b> | RNF_169 | ANML_2 | Lepidoptera | Agrotis  | Agrotis crassa, Agrotis bigramma        |
| <b>BOLD:ACF3089</b> | RNF_179 | ANML_2 | Lepidoptera | Agrotis  | Agrotis crassa, Agrotis bigramma        |
| <b>BOLD:ACF3089</b> | RNF_197 | ZBJ_2  | Lepidoptera | Agrotis  | Agrotis crassa, Agrotis bigramma        |
| <b>BOLD:ACF3089</b> | RNF_207 | ZBJ_2  | Lepidoptera | Agrotis  | Agrotis crassa, Agrotis bigramma        |
| <b>BOLD:ACF3089</b> | RNF_240 | ZBJ_2  | Lepidoptera | Agrotis  | Agrotis crassa, Agrotis bigramma        |
| <b>BOLD:ACJ2905</b> | RNF_74  | ZBJ_1  | Diptera     | Diastata |                                         |
| <b>BOLD:ACL7274</b> | RNF_12  | ANML_1 | Blattodea   | Ectobius | Ectobius pallidus                       |
| <b>BOLD:ACL7274</b> | RNF_23  | ZBJ_2  | Blattodea   | Ectobius | Ectobius pallidus                       |
| <b>BOLD:ACL7274</b> | RNF_25  | ZBJ_2  | Blattodea   | Ectobius | Ectobius pallidus                       |
| <b>BOLD:ACL7274</b> | RNF_28  | ZBJ_2  | Blattodea   | Ectobius | Ectobius pallidus                       |
| <b>BOLD:ACL7274</b> | RNF_29  | ZBJ_2  | Blattodea   | Ectobius | Ectobius pallidus                       |
| <b>BOLD:ACL7274</b> | RNF_42  | ANML_1 | Blattodea   | Ectobius | Ectobius pallidus                       |
| <b>BOLD:ACL7274</b> | RNF_53  | ZBJ_2  | Blattodea   | Ectobius | Ectobius pallidus                       |
| <b>BOLD:ACL7274</b> | RNF_54  | ANML_1 | Blattodea   | Ectobius | Ectobius pallidus                       |
| <b>BOLD:ACL7274</b> | RNF_57  | ZBJ_2  | Blattodea   | Ectobius | Ectobius pallidus                       |
| <b>BOLD:ACL7274</b> | RNF_59  | ZBJ_2  | Blattodea   | Ectobius | Ectobius pallidus                       |
| <b>BOLD:ACL7274</b> | RNF_70  | ANML_1 | Blattodea   | Ectobius | Ectobius pallidus                       |
| <b>BOLD:ACL7274</b> | RNF_77  | ZBJ_2  | Blattodea   | Ectobius | Ectobius pallidus                       |
| <b>BOLD:ACL7274</b> | RNF_78  | ANML_1 | Blattodea   | Ectobius | Ectobius pallidus                       |
| <b>BOLD:ACL7274</b> | RNF_81  | ZBJ_2  | Blattodea   | Ectobius | Ectobius pallidus                       |
| <b>BOLD:ACL7274</b> | RNF_82  | ANML_1 | Blattodea   | Ectobius | Ectobius pallidus                       |
| <b>BOLD:ACL7274</b> | RNF_82  | ZBJ_2  | Blattodea   | Ectobius | Ectobius pallidus                       |
| <b>BOLD:ACL7274</b> | RNF_95  | ZBJ_2  | Blattodea   | Ectobius | Ectobius pallidus                       |
| <b>BOLD:ACL7274</b> | RNF_103 | ANML_1 | Blattodea   | Ectobius | Ectobius pallidus                       |

---

|                     |         |        |             |            |                     |
|---------------------|---------|--------|-------------|------------|---------------------|
| <b>BOLD:ACL7274</b> | RNF_104 | ANML_1 | Blattodea   | Ectobius   | Ectobius pallidus   |
| <b>BOLD:ACL7274</b> | RNF_104 | ZBJ_2  | Blattodea   | Ectobius   | Ectobius pallidus   |
| <b>BOLD:ACL7274</b> | RNF_105 | ZBJ_2  | Blattodea   | Ectobius   | Ectobius pallidus   |
| <b>BOLD:ACL7274</b> | RNF_120 | ANML_1 | Blattodea   | Ectobius   | Ectobius pallidus   |
| <b>BOLD:ACL7274</b> | RNF_128 | ANML_1 | Blattodea   | Ectobius   | Ectobius pallidus   |
| <b>BOLD:ACL7274</b> | RNF_129 | ZBJ_2  | Blattodea   | Ectobius   | Ectobius pallidus   |
| <b>BOLD:ACL7274</b> | RNF_133 | ZBJ_2  | Blattodea   | Ectobius   | Ectobius pallidus   |
| <b>BOLD:ACL7274</b> | RNF_140 | ZBJ_2  | Blattodea   | Ectobius   | Ectobius pallidus   |
| <b>BOLD:ACL7274</b> | RNF_141 | ANML_1 | Blattodea   | Ectobius   | Ectobius pallidus   |
| <b>BOLD:ACL7274</b> | RNF_147 | ANML_1 | Blattodea   | Ectobius   | Ectobius pallidus   |
| <b>BOLD:ACL7274</b> | RNF_160 | ANML_1 | Blattodea   | Ectobius   | Ectobius pallidus   |
| <b>BOLD:ACL7274</b> | RNF_169 | ANML_1 | Blattodea   | Ectobius   | Ectobius pallidus   |
| <b>BOLD:ACL7274</b> | RNF_171 | ANML_1 | Blattodea   | Ectobius   | Ectobius pallidus   |
| <b>BOLD:ACL7274</b> | RNF_202 | ANML_1 | Blattodea   | Ectobius   | Ectobius pallidus   |
| <b>BOLD:ACL7274</b> | RNF_215 | ZBJ_2  | Blattodea   | Ectobius   | Ectobius pallidus   |
| <b>BOLD:ACL7274</b> | RNF_219 | ANML_1 | Blattodea   | Ectobius   | Ectobius pallidus   |
| <b>BOLD:ACL7274</b> | RNF_226 | ZBJ_2  | Blattodea   | Ectobius   | Ectobius pallidus   |
| <b>BOLD:ACL7274</b> | RNF_229 | ANML_1 | Blattodea   | Ectobius   | Ectobius pallidus   |
| <b>BOLD:ACL7274</b> | RNF_231 | ANML_1 | Blattodea   | Ectobius   | Ectobius pallidus   |
| <b>BOLD:ACL7274</b> | RNF_240 | ZBJ_2  | Blattodea   | Ectobius   | Ectobius pallidus   |
| <b>BOLD:ACL7274</b> | RNF_251 | ANML_1 | Blattodea   | Ectobius   | Ectobius pallidus   |
| <b>BOLD:ACL7274</b> | RNF_251 | ZBJ_2  | Blattodea   | Ectobius   | Ectobius pallidus   |
| <b>BOLD:ACR4033</b> | RNF_3   | ZBJ_2  | Diptera     | Coenosia   | Coenosia albicornis |
| <b>BOLD:ACR4033</b> | RNF_56  | ZBJ_2  | Diptera     | Coenosia   | Coenosia albicornis |
| <b>BOLD:ACR4033</b> | RNF_115 | ZBJ_2  | Diptera     | Coenosia   | Coenosia albicornis |
| <b>BOLD:ACR4033</b> | RNF_126 | ZBJ_2  | Diptera     | Coenosia   | Coenosia albicornis |
| <b>BOLD:ACR4033</b> | RNF_194 | ZBJ_2  | Diptera     | Coenosia   | Coenosia albicornis |
| <b>BOLD:ACR4033</b> | RNF_201 | ZBJ_2  | Diptera     | Coenosia   | Coenosia albicornis |
| <b>BOLD:ACR4033</b> | RNF_223 | ZBJ_2  | Diptera     | Coenosia   | Coenosia albicornis |
| <b>BOLD:ACT0928</b> | RNF_249 | ZBJ_2  | Hemiptera   | Aphrophora | Aphrophora corticea |
| <b>BOLD:ADB5574</b> | RNF_25  | ZBJ_2  | Diptera     |            |                     |
| <b>BOLD:ADB5574</b> | RNF_57  | ZBJ_2  | Diptera     |            |                     |
| <b>BOLD:ADB5574</b> | RNF_169 | ZBJ_2  | Diptera     |            |                     |
| <b>BOLD:ADB5574</b> | RNF_207 | ZBJ_2  | Diptera     |            |                     |
| <b>BOLD:ADC8699</b> | RNF_9   | ZBJ_2  | Hymenoptera | Campoletis |                     |
| <b>BOLD:ADC8699</b> | RNF_16  | ZBJ_2  | Hymenoptera | Campoletis |                     |
| <b>BOLD:ADC8699</b> | RNF_25  | ZBJ_2  | Hymenoptera | Campoletis |                     |
| <b>BOLD:ADC8699</b> | RNF_26  | ZBJ_2  | Hymenoptera | Campoletis |                     |
| <b>BOLD:ADC8699</b> | RNF_49  | ZBJ_2  | Hymenoptera | Campoletis |                     |
| <b>BOLD:ADC8699</b> | RNF_57  | ZBJ_2  | Hymenoptera | Campoletis |                     |
| <b>BOLD:ADC8699</b> | RNF_81  | ZBJ_2  | Hymenoptera | Campoletis |                     |
| <b>BOLD:ADC8699</b> | RNF_86  | ZBJ_1  | Hymenoptera | Campoletis |                     |
| <b>BOLD:ADC8699</b> | RNF_113 | ZBJ_2  | Hymenoptera | Campoletis |                     |
| <b>BOLD:ADC8699</b> | RNF_162 | ZBJ_2  | Hymenoptera | Campoletis |                     |
| <b>BOLD:ADC8699</b> | RNF_169 | ZBJ_2  | Hymenoptera | Campoletis |                     |

---

---

|                     |         |        |             |            |                  |
|---------------------|---------|--------|-------------|------------|------------------|
| <b>BOLD:ADC8699</b> | RNF_175 | ZBJ_1  | Hymenoptera | Campoletis |                  |
| <b>BOLD:ADC8699</b> | RNF_197 | ZBJ_2  | Hymenoptera | Campoletis |                  |
| <b>BOLD:ADC8699</b> | RNF_207 | ZBJ_2  | Hymenoptera | Campoletis |                  |
| <b>BOLD:ADC8699</b> | RNF_240 | ZBJ_2  | Hymenoptera | Campoletis |                  |
| <b>BOLD:ADC8699</b> | RNF_251 | ZBJ_2  | Hymenoptera | Campoletis |                  |
| <b>BOLD:ADG2771</b> | RNF_26  | ANML_1 | Coleoptera  | Stagetus   | Stagetus ferreri |
| <b>BOLD:ADG2771</b> | RNF_206 | ANML_1 | Coleoptera  | Stagetus   | Stagetus ferreri |
| <b>BOLD:ADG2771</b> | RNF_207 | ANML_1 | Coleoptera  | Stagetus   | Stagetus ferreri |
| <b>BOLD:ADG2771</b> | RNF_223 | ANML_1 | Coleoptera  | Stagetus   | Stagetus ferreri |

---

## Supplementary Figures

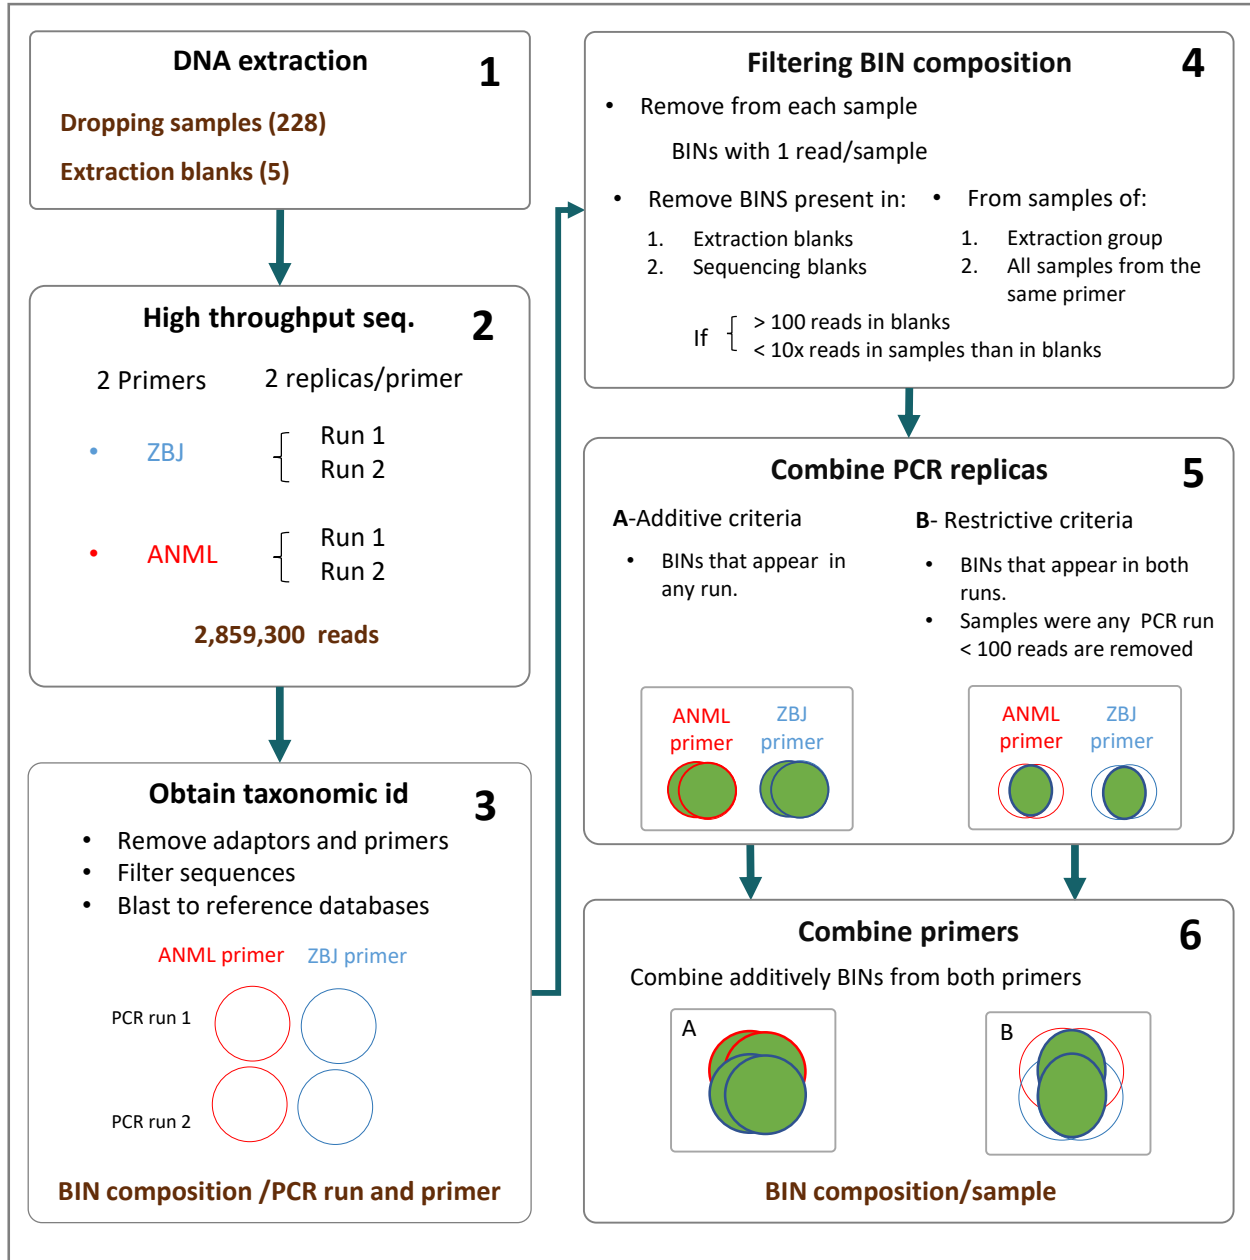

**Fig. S1** – Flow chart summarising the process followed to to obtain taxonomic prey composition from dropping samples of *M. escalerae* and *M. crypticus*.

a) *M. escalerae*

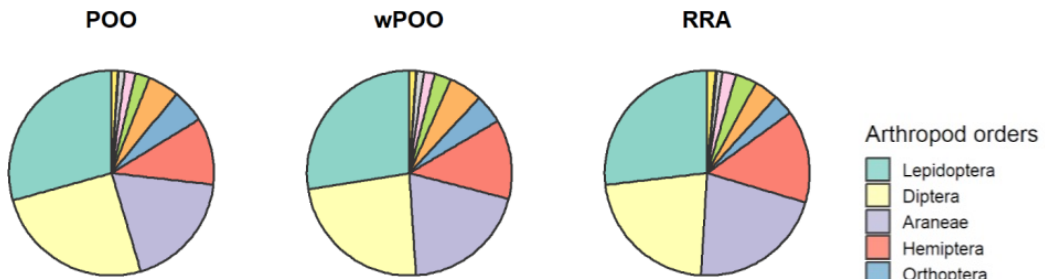

b) *M. crypticus*

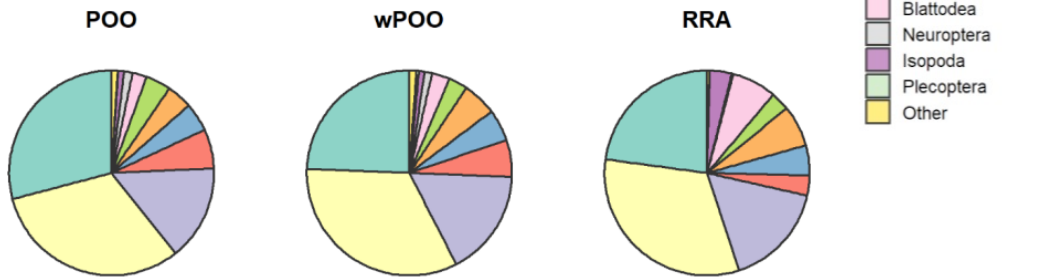

**Fig. S2** – The diet of *Myotis escalerae* (a) and *Myotis crypticus* (b) according to percent frequency of occurrence (POO), weighted percent of occurrence (wPOO) and relative read abundance (RRA).

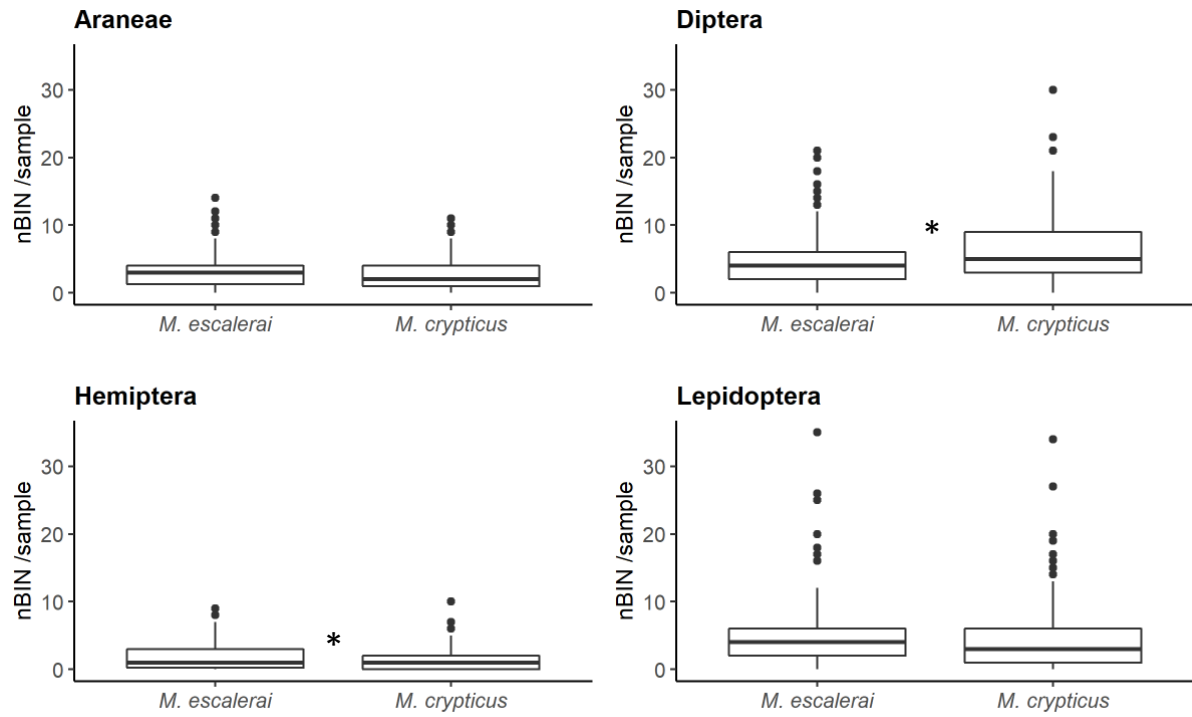

**Fig. S3** – Number of BINs per sample of each of the four main Arthropod orders in the diet of *Myotis escalerai* and *Myotis crypticus*. Box represents first and third data quartiles. Whiskers extend from the hinge to the largest value no further than 1.5 times the distance between the first and third quartiles. Data beyond the end of the whiskers are plotted individually. Statistically significant differences are noted with a star.



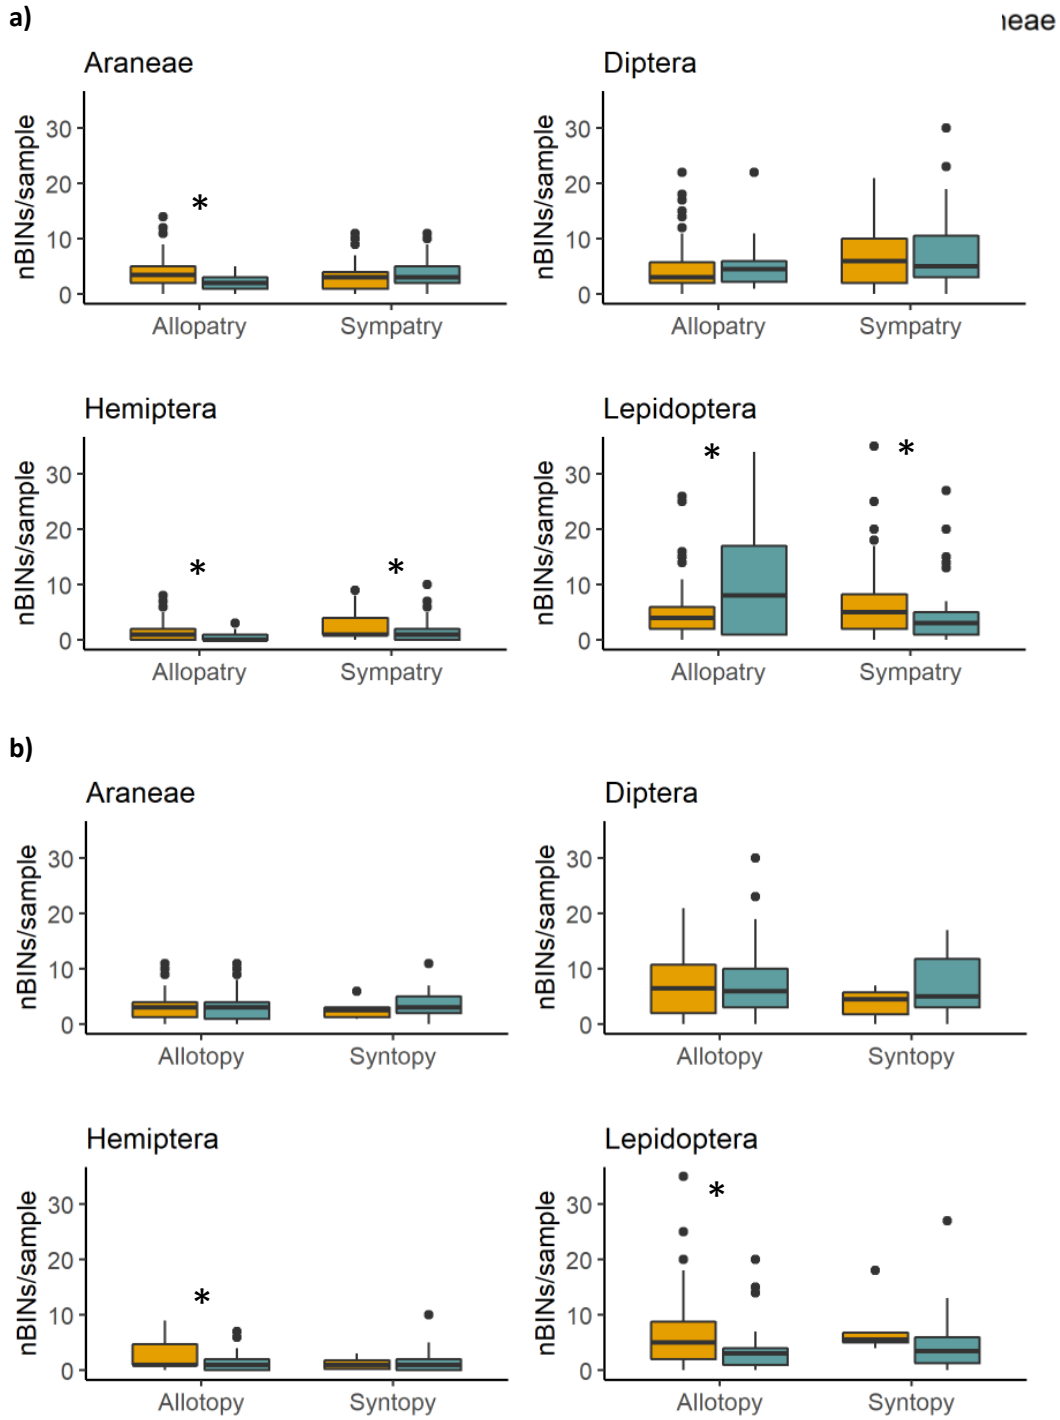

**Fig. S4** – Number of BINs of each of the four main Arthropod orders in bat samples from sympatric and allopatric locations at the regional scale (a) and at fine scale (b). Statistically significant differences are noted with a star. Boxplot interpretation is detailed in Fig. S3.

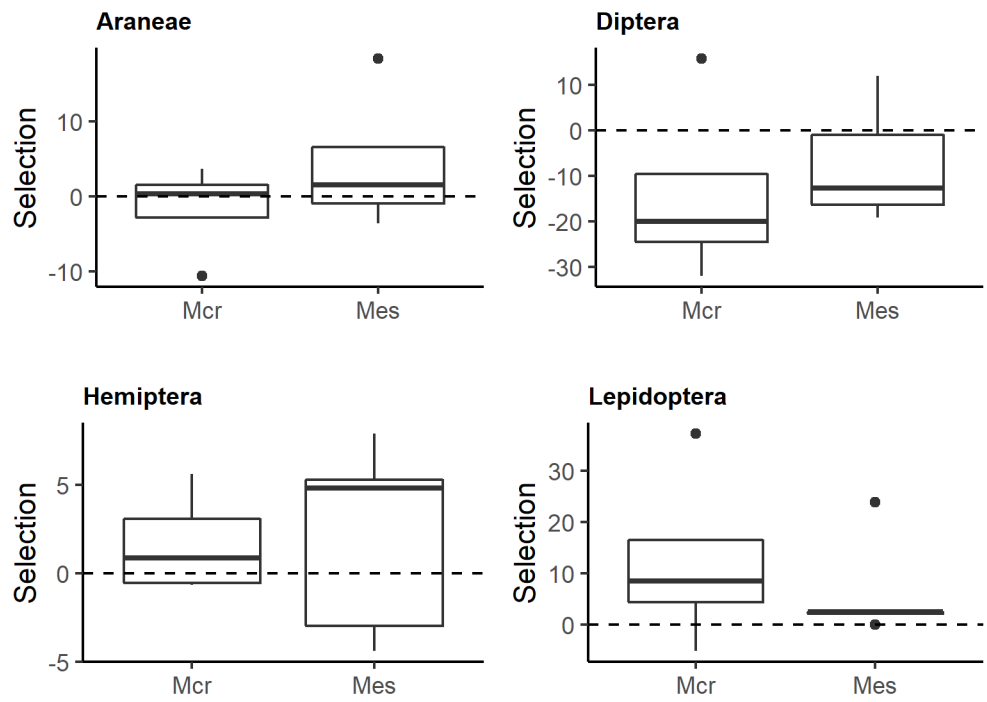

**Fig. S5** – Selection values (bat diet wPOO – Arthropod availability) of *M. escalerae* and *M. crypticus* towards each of the main arthropod orders. Boxplot interpretation is detailed in Fig. S3.

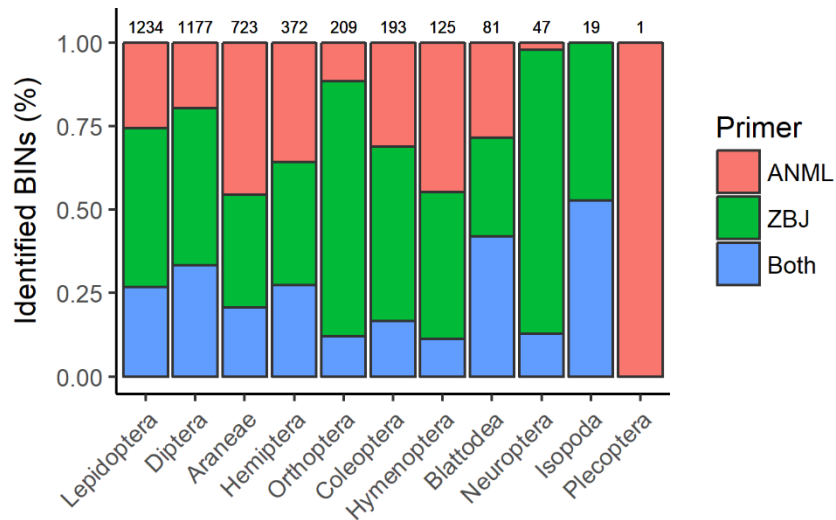

**Fig. S6** – Number of BINs of each order. Portions coloured depending on the primer from which it was recovered. Red recovered uniquely by ANML, green uniquely by ZBJ, and blue recovered by both. Numbers above columns show number of BINs.

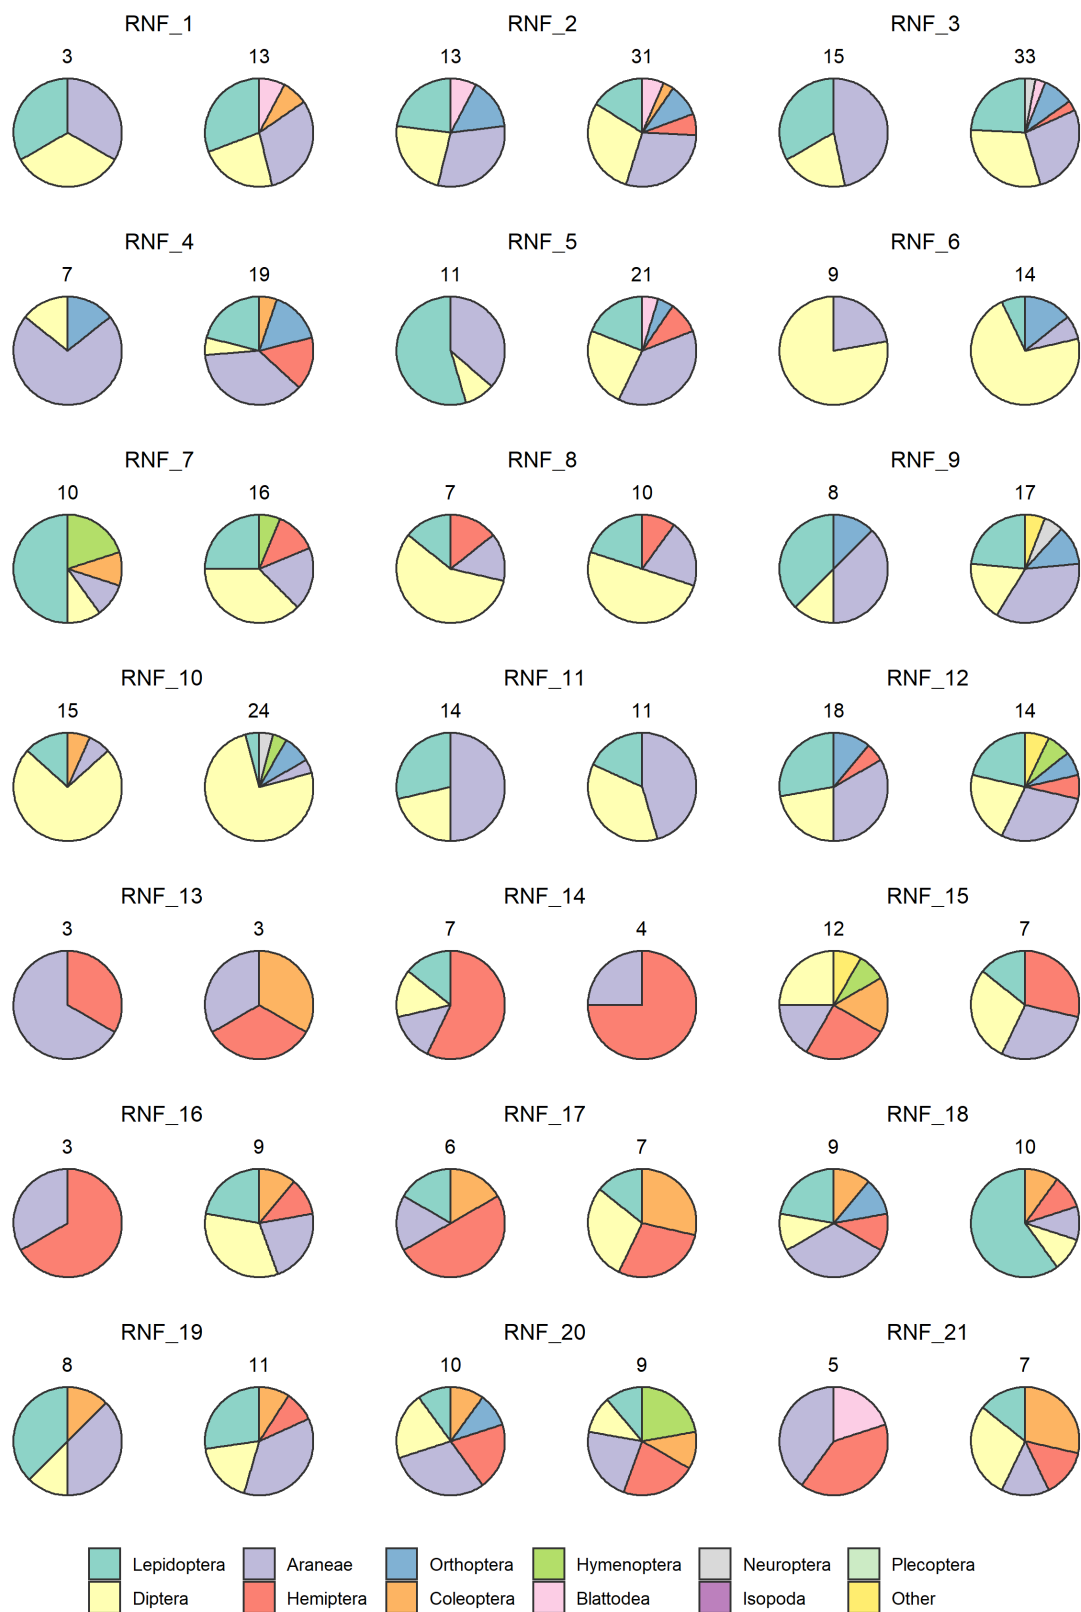

**Fig. S7** – Prey order composition of a subset of individual dropping samples (RNF 1-21) comparing ANML (left) and ZBJ (right) primers. Number on top of each pie chart shows total BINs recovered.

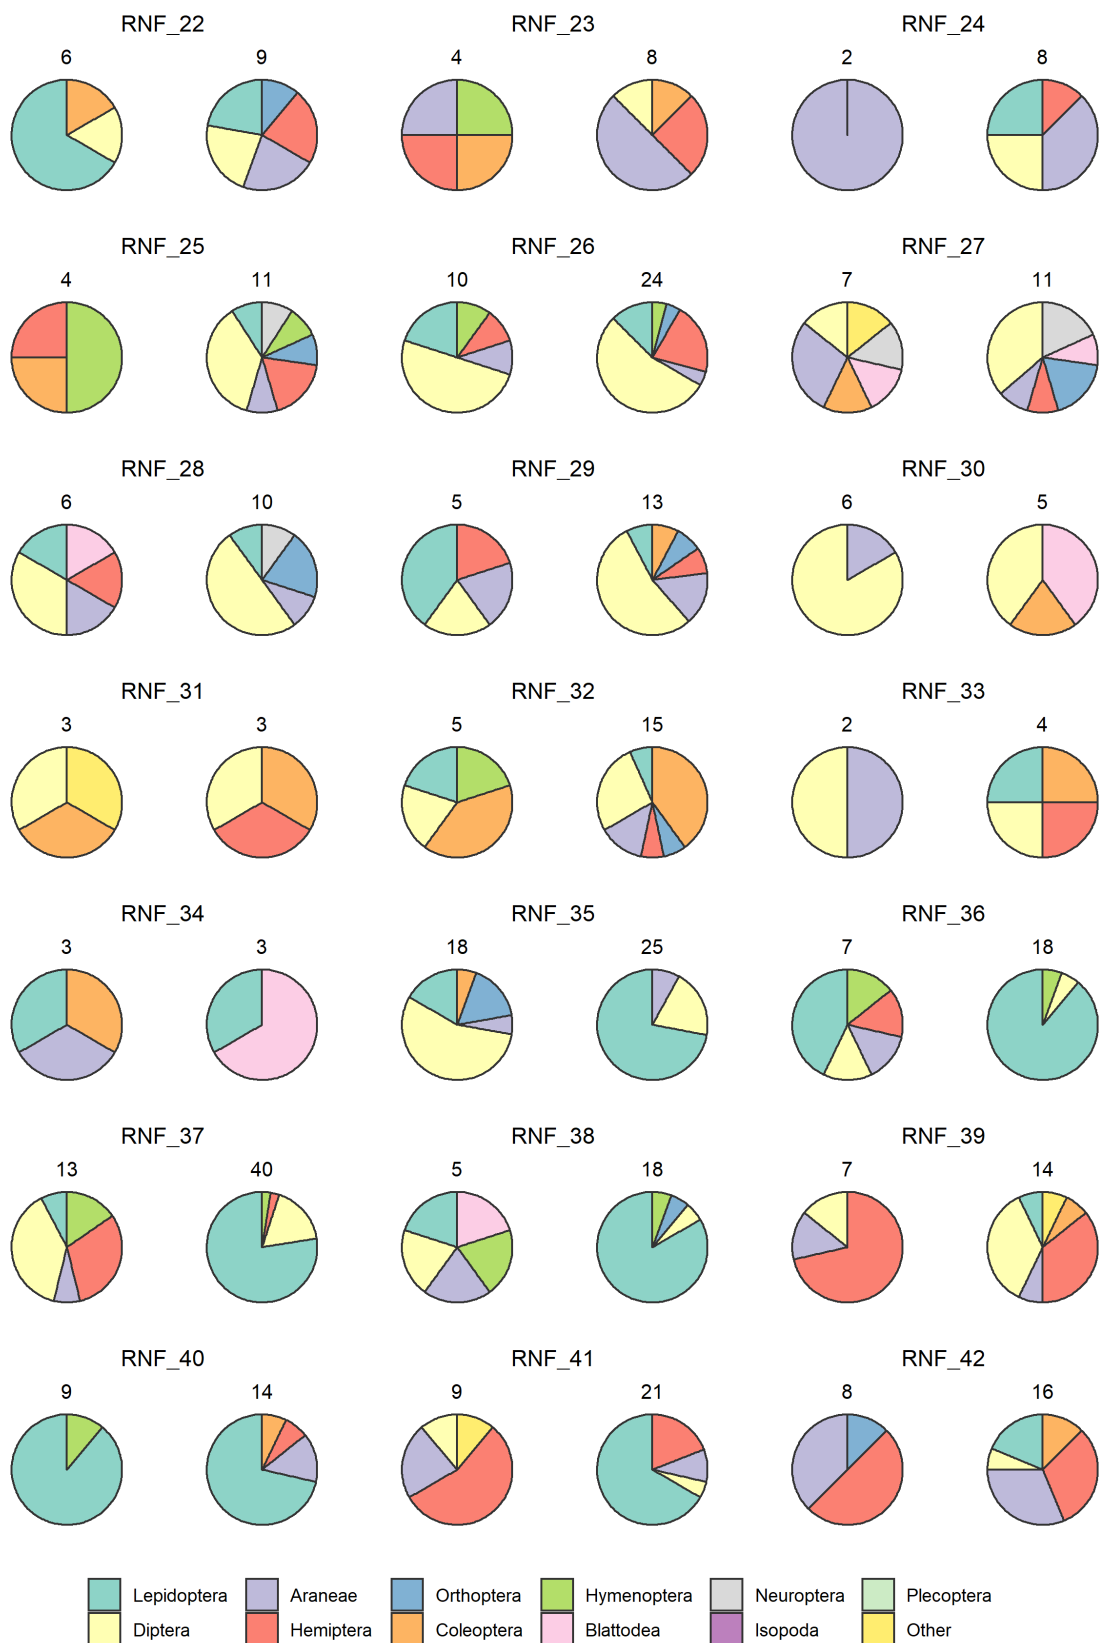

**Fig. S8** – Prey order composition of a subset of individual dropping samples (RNF 22-42) comparing ANML (left) and ZBJ (right) primers. Number on top of each pie chart shows total BINs recovered.

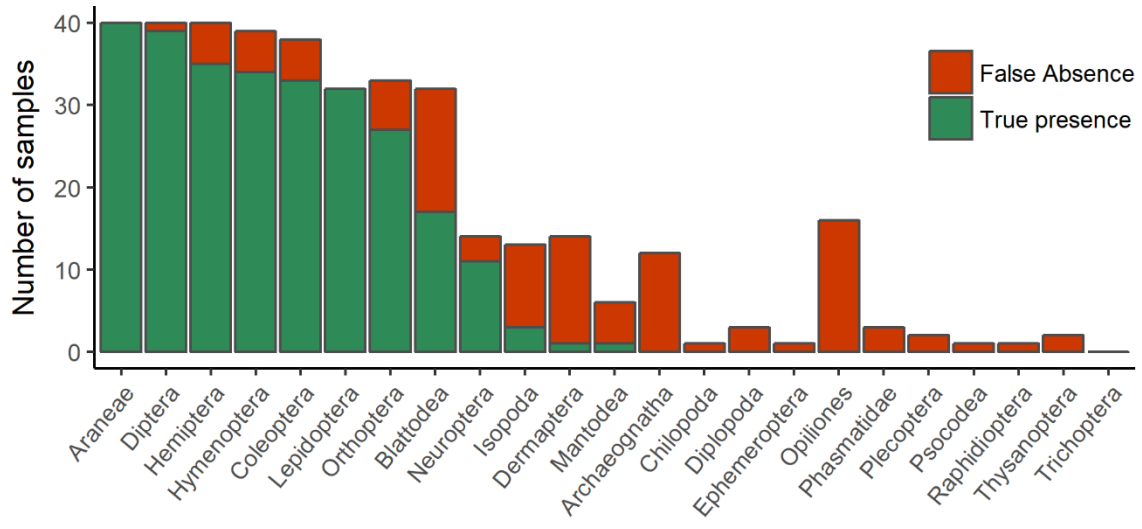

**Fig. S9** – Number of samples in which each order appears in the morphological identification of sweeping samples (total bar height), and portion of those in which the order was present and absent in the subsequent molecular metabarcoding identification.

a) Inclusive criteria

Diet *Myotis escaleraei* (wPOO)

Diet *Myotis crypticus* (wPOO)

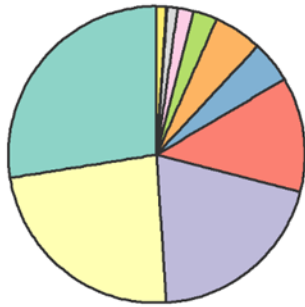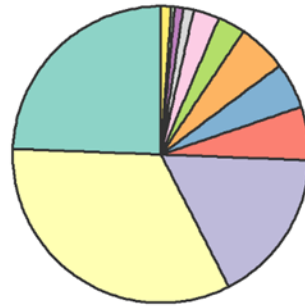

Arthropod orders

- Lepidoptera
- Diptera
- Araneae
- Hemiptera
- Orthoptera
- Coleoptera
- Hymenoptera
- Blattodea
- Neuroptera
- Isopoda
- Plecoptera
- Other

b) Conservative criteria

Diet *Myotis escaleraei* (wPOO)

Diet *Myotis crypticus* (wPOO)

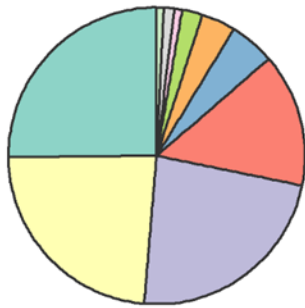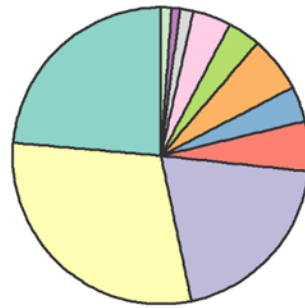

**Fig. S9** – Overall diet composition of *M. escaleraei* and *M. crypticus* using weighted Percent of Occurrence (wPOO). Using the inclusive criteria (a) and the conservative union criteria (b) to pool prey composition from PCR replicates.
